# Supplementary material for: Stereo- and regio-selective one-pot synthesis of triazole-based unnatural amino acids and β-amino triazoles
Source: Royal Society of Chemistry journal article supplement (doi:10.1039/c2cc32392c), 2012-01-01

# **Stereo and regio-selective one-pot synthesis of triazole-based unnatural amino acids and $\beta$ - amino triazoles**

R. B. Nasir Baig and Rajender S. Varma\*

*Sustainable Technology Division, National Risk Management Research Laboratory, U. S. Environmental Protection Agency, MS 443, Cincinnati, Ohio 45268, USA. Fax: 513- 569-7677; Tel: 513-487-2701.*

*E-mail: [varma.rajender@epa.gov](mailto:varma.rajender@epa.gov)*

## **Supporting Information**

### **Table of Contents**

|                                                                                         |                         |
|-----------------------------------------------------------------------------------------|-------------------------|
| <b>Scheme, Experimental Procedures and data</b>                                         | <b>Page Number 2-8</b>  |
| <b><math>^1\text{H}</math>, and <math>^{13}\text{C}</math> NMR spectra of compounds</b> | <b>Page Number 9-44</b> |

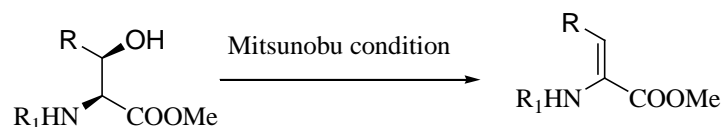

Scheme 1 dehydroamino acids

## General Methods

All the reactions were performed in oven dried apparatus and were stirred magnetically. Melting points and optical rotation values reported are uncorrected. Infrared spectra were recorded using an FTIR instrument, the frequencies are reported in wave numbers ( $\text{cm}^{-1}$ ), and intensities of the peak are denoted as s (strong), w (weak), m (medium), broad (br).  $^1\text{H}$  and  $^{13}\text{C}$  spectra were recorded at 300 MHz and 75 MHz NMR instruments, respectively. Chemical shifts are reported in parts per million downfield from the internal reference, tetramethylsilane (TMS). Multiplicity is indicated using the following abbreviations: s (singlet), d (doublet), dd (double doublet), t (triplet), m (multiplet), bs (broad singlet). CHN analysis has been performed using Perkin Elmer instrument. References for the compound reported previously are indicated against each of them along with the characterization data.

### General Procedure for the Synthesis of *N*-Boc- and *N*-Cbz-, Sulfamidates.

Step I. A solution of SOCl<sub>2</sub> (1.2 equiv) in dry CH<sub>3</sub>CN under nitrogen was cooled to -40 °C, and then Boc-Threo-OMe (1.0 equiv) in dry CH<sub>3</sub>CN was added dropwise over 10 min and stirring continued for a further 45 min at the same temperature. Dry pyridine (4.0 equiv) was then added. The reaction mixture was further stirred for 1 h and then allowed to warm to room temperature. The reaction mixture was quenched with water and extracted with ethyl acetate. The combined organic extract was washed with water, dried over anhydrous sodium sulfate (Na<sub>2</sub>SO<sub>4</sub>), and concentrated in vacuum to afford the crude sulfamidite. This was used without further purification in the next step.

Step II. To a cooled (ice bath) solution of crude (step I) sulfamidite in MeCN was added ruthenium- (III) chloride (5 mol %) followed by NaIO<sub>4</sub> (1.2 equiv) and then water (CH<sub>3</sub>CN:H<sub>2</sub>O, 1:1). The mixture was stirred at °C for 1-3h and diluted with ether, and the phases were separated. The aqueous phase was extracted with ether. The combined organic portions were washed with NaHCO<sub>3</sub> solution and then brine. The solution was dried over anhydrous (Na<sub>2</sub>SO<sub>4</sub>) and concentrated. The crude product was purified by silica gel (100-200 mesh) column chromatography

**(R)-tert-butyl-4-benzyl-1,2,3-oxathiazolidine-3-carboxylate 2,2-dioxide, (sulfamidate entry 9-13):** Yield (87%) white solid; mp- 138°C;  $[\alpha]_D^{25}$  -41.2 (*c* = 0.7%, CHCl<sub>3</sub>); I R (Neat), 2973(w), 2927(m), 1712(s), 1458(w), 1320(s), 1261(m), 1184(s), 1150(s), 1023(w), 838(m), 799(s), 784(m), 695(s), 657(m), 540(m), cm<sup>-1</sup>; <sup>1</sup>H NMR (300 MHz, CDCl<sub>3</sub>)  $\delta$  1.55 (9H, s), 2.92 (1H, dd, *J* = 9.9, 13.5), 3.36 (1H, dd, *J* = 3.3, 13.5), 4.28-4.34(1H, m), 4.40-4.48(2H, m), 7.21-7.37(5H, m); (75 MHz, CDCl<sub>3</sub>)  $\delta$  27.9, 37.8, 58.5, 68.7, 85.5, 127.4, 129.0, 129.4, 135.1, 148.4. Analysis calculated for C<sub>14</sub>H<sub>19</sub>NO<sub>5</sub>S: C 53.66, H 6.11, N 4.47; Found C 53.63, H 6.13, N 4.45.

**(R)-tert-butyl-4-((S)-sec-butyl)-1,2,3-oxathiazolidine-3-carboxylate-2,2-dioxide, (sulfamidate entry 14-16)**

Yield (91%) white solid; mp- 99°C;  $[\alpha]_D^{25}$  2.16 (*c* = 0.5%, CHCl<sub>3</sub>); I R (Neat), 2977(m), 2934(w), 1728(s), 1466(w), 1367(s), 1325(s), 1261(m), 1187(s), 1150(s), 1099(m), 968(m), 927(m), 826(s), 805(s), 653(s), 571(s), cm<sup>-1</sup>; <sup>1</sup>H NMR (300 MHz, CDCl<sub>3</sub>)  $\delta$  0.96-1.04 (6H, m), 1.15-1.44 (2H, m), 1.57(9H, s), 2.03-2.12(1H, m), 4.28-4.33 (1H, m), 4.39 (1H, dd, *J* = 2.4, 9.6), 4.57 (1H, dd, *J* = 9.3, 6.6); (75 MHz, CDCl<sub>3</sub>)  $\delta$  11.7, 13.0, 25.3, 27.9, 36.1, 60.8, 66.3, 85.3, 149.0. Analysis calculated for C<sub>11</sub>H<sub>21</sub>NO<sub>5</sub>S: C 47.29, H 7.58, N 5.01; Found C 47.27, H 7.55, N 5.05.

### General procedure for the synthesis of triazole based unnatural amino acids.

1.0 mmol of sulfamidate, 1.2 mmol of  $\text{NaN}_3$ , 1.2 mmol of alkyne, 5 mol% of  $\text{CuSO}_4$ , 10 mol% of sodium ascorbate and 10 mg-Cu metal were placed in a crimp-sealed thick-walled glass tube equipped with a pressure sensor and a magnetic stirrer and 5 mL ( *t*BuOH:  $\text{H}_2\text{O}$ ) of solvent was added to the reaction mixture. The reaction tube was placed inside the cavity of a CEM Discover focused microwave synthesis system, operated at 120 °C (temperature monitored by a built-in infrared sensor), power 100 Watt and pressure 10–60 psi for 20-30 min min. After completion of the reaction 3-4 mL of saturated citric acid solution was added and stirs the reaction mixture for 5-10 min at room temperature. Dilute with water and extracted with ethyl acetate and purified by column chromatography. product were characterized using FT-IR,  $^1\text{H}$ , and  $^{13}\text{C}$  NMR and ele analysis.

#### (2S,3S)-methyl-2-(((benzyloxy)carbonyl)amino)-3-(4-phenyl-1H-1,2,3-triazol-1-

yl)butanoate, **1a** : Yield (84%); white solid; mp- 149°C;  $[\alpha]_D^{25}$  54.3 ( $c$  = 0.24%  $\text{CHCl}_3$ ); I R (Neat), 3350 (m), 3154 (w), 1724(s), 1523(m), 1249(m), 1232(m), 1001(s), 971(s), 764(s), 692(s),  $\text{cm}^{-1}$ ;  $^1\text{H}$  NMR (300 MHz,  $\text{CDCl}_3$ )  $\delta$  1.79 (3H, d,  $J$  = 6 Hz), 3.75 (3H, s), 4.81 (1H, dd,  $J$  = 4.5 Hz & 8.4 Hz), 5.11-5.17 ( 3H, m), 5.69 (1H, d,  $J$  = 6.6 Hz), 7.27-7.47 (8H, m), 7.74 (1H, s), 7.80-7.83 (2H, m);  $^{13}\text{C}$  (75 MHz,  $\text{CDCl}_3$ )  $\delta$  16.61, 53.0, 58.2, 58.3, 67.4, 118.6, 125.7, 128.1, 128.2, 128.3, 128.5, 128.8, 130.1, 130.4; Analysis calculated for  $\text{C}_{21}\text{H}_{22}\text{N}_4\text{O}_4$ : C 63.95, H 5.62, N 14.20; Found C 63.97, H 5.61, N 14.18.

#### (2S,3S)-methyl-2-(((benzyloxy)carbonyl)amino)-3-(4-(p-tolyl)-1H-1,2,3-triazol-1-

yl)butanoate, **2a** : Yield (85%); white solid; mp-138°C;  $[\alpha]_D^{25}$  61.4 ( $c$  = 0.41%,  $\text{CHCl}_3$ ); I R (Neat), 3349(w), 3155(w), 2858(m), 1719(s), 1478 (m), 1076(m), 998(s), 972(s), 820(s), 798(m), 723(w)  $\text{cm}^{-1}$ ;  $^1\text{H}$  NMR (300 MHz,  $\text{CDCl}_3$ )  $\delta$  1.78 (3H, d,  $J$  = 6.3Hz), 2.40 (3H, s), 3.73 ( 3H, s), 4.80 (1H, dd,  $J$  = 4.2 Hz, 8.4 Hz), 5.12-5.17 (3H, m), 5.70 (1H, d,  $J$  = 4.2), 7.23-7.37 (7H, m), 7.69-7.72 (3H, 8.1 Hz), 7.97 (1H, s);  $^{13}\text{C}$  (75 MHz,  $\text{CDCl}_3$ )  $\delta$  16.6, 21.2, 52.9, 58.2, 58.7, 67.4, 118.2, 125.6, 128.1, 128.3, 128.5, 129.4, 130.6, 130.8, 138.0, 148.0, 155.7, 169.1; Analysis calculated for  $\text{C}_{22}\text{H}_{24}\text{N}_4\text{O}_4$ : C 64.69, H 5.92, N 13.72; Found C 64.67, H 5.89, N 13.76.

#### (2S,3S)-methyl-2-(((benzyloxy)carbonyl)amino)-3-(4-(4-formylphenyl)-1H-1,2,3-triazol-1-

yl)butanoate, **3a** : Yield (81%); white solid; mp- 140°C;  $[\alpha]_D^{25}$  60.2 ( $c$  = 0.22%,  $\text{CHCl}_3$ ); I R (Neat), 3426(w), 3127(w), 2957(w), 2728(w), 1750(s), 1728(s), 1693(s), 1611(m), 1557(s), 1451(m), 1439(m), 1352(m), 1310(w), 1234(w), 1211(s), 1171(s), 1155(m), 1052(m), 985(m), 826(s), 751(s), 698(s), 673(m),  $\text{cm}^{-1}$ ;  $^1\text{H}$  NMR (300 MHz,  $\text{CDCl}_3$ )  $\delta$  1.78 (3H, d,  $J$  = 6.9), 3.76 (3H, s), 4.84 (1H, dd,  $J$  = 4.5 Hz, 8.4 Hz) 5.04-5.37 (3H, m), 5.74 (1H, d,  $J$  = 6.9), 7.32 (5H, bs), 7.92 (1H, s), 7.95 (2H, d,  $J$  = 6.3 Hz), 7.98 (2H,  $J$  = 6.3 Hz), 10.03 (1H, s);  $^{13}\text{C}$  (75 MHz,  $\text{CDCl}_3$ )

$\delta$  16.4, 53.08, 58.2, 58.3, 67.4, 120.0, 126.0, 128.1, 128.3, 128.5, 130.3, 135.8, 136.2, 146.2, 155.6, 169.0, 191.6; Analysis calculated for  $C_{22}H_{22}N_4O_5$ : C 62.55, H 5.25, N 13.26; Found C 62.57, H 5.23, N 13.24.

**(2S,3S)-methyl-2-(((benzyloxy)carbonyl)amino)-3-(4-(4-nitrophenyl)-1H-1,2,3-triazol-1-yl)butanoate, 4a:** Yield (76%); white solid; mp- 167°C;  $[\alpha]_D^{25}$  45.1 ( $c$  = 0.16%,  $CHCl_3$ ); IR (Neat), 3450 (w), 3126(w), 1752(m), 1728(s), 1609(w), 1515(s), 1352(s), 1336(m), 1210(m), 1173(m), 1053(m), 1210(m), 857(m), 751(s), 699(s), 680(m),  $cm^{-1}$ ;  $^1H$  NMR (300 MHz,  $CDCl_3$ )  $\delta$  1.78 (3H, d,  $J$  = 7.2 Hz), 3.79 (3H, s), 4.84 (1H, dd,  $J$  = 4.5 Hz, 8.1 Hz), 5.05-5.25 (3H, m), 5.66 (1H, d,  $J$  = 5.7), 7.35 (5H, bs), 7.88 (1H, s), 7.97 (2H, d,  $J$  = 9 Hz), 8.30 (2H, d,  $J$  = 9 Hz);  $^{13}C$  (75 MHz,  $CDCl_3$ )  $\delta$  16.5, 53.1, 58.2, 58.4, 67.5, 120.3, 124.2, 126.1, 128.1, 128.4, 128.6, 136.6, 145.4, 147.4, 154.0, 168.9; Analysis calculated for  $C_{21}H_{21}N_5O_6$ : C 57.40, H 4.82, N 15.94; Found C 57.38, H 4.84, N 15.91.

**(2S,3S)-methyl-2-(((benzyloxy)carbonyl)amino)-3-(4-(pyridin-2-yl)-1H-1,2,3-triazol-1-yl)butanoate, 5a:** Yield (79 %); white solid; mp- 155°C;  $[\alpha]_D^{25}$  55.3 ( $c$  = 0.25%,  $CHCl_3$ ); IR (Neat), 3235(m), 3131(m), 3059(w), 1745(s), 1750(s), 1725(s), 1559(m), 1555(s), 1472(m), 1355(s), 1314(s), 1254(s), 1215(s), 1191(m), 1083(s), 1066(s), 1000(s), 970(s), 971(m), 734(m), 725(s), 697(s), 697(s), 674(s), 619(m),  $cm^{-1}$ ;  $^1H$  NMR (300 MHz,  $CDCl_3$ )  $\delta$  1.77 (3H, d,  $J$  = 6.9), 3.74 (3H, s), 4.83 (1H, dd,  $J$  = 4.2, 8.4), 5.09-5.22 (3H, m), 5.78 (1H, d,  $J$  = 6.3) 7.21-7.32 (6H, m), 7.75-7.80 (1H, m), 8.16-8.19 (2H, m), 8.57-8.59 (1H, m);  $^{13}C$  (75 MHz,  $CDCl_3$ )  $\delta$  16.5, 52.9, 58.31, 58.38, 67.4, 120.2, 121.1, 122.8, 128.1, 128.2, 128.5, 136.8, 148.2, 149.3, 150.1, 155.7, 169.0; Analysis calculated for  $C_{20}H_{21}N_5O_4$ : C 60.75, H 5.35, N 15.46; Found C 60.73, H 5.33, N 15.44.

**(2S,3S)-methyl-2-(((benzyloxy)carbonyl)amino)-3-(4-(2-hydroxyethyl)-1H-1,2,3-triazol-1-yl)butanoate, 6a:** Yield (86%); white solid; mp- 98°C;  $[\alpha]_D^{25}$  45.5 ( $c$  = 0.24%,  $CHCl_3$ ); IR (Neat) 3450(w), 3316(s), 3040(w), 2901(w), 2827(s), 1742(s), 1696(s), 1654(m), 1335(s), 1491(s), 1436(s), 1535(s), 1289(s), 1223(s), 1063(s), 1223(s), 1063(s), 1009(m), 736(m), 594(s),  $cm^{-1}$ ;  $^1H$  NMR (300 MHz,  $CDCl_3$ )  $\delta$  1.68 (3H, d,  $J$  = 7.2), 2.92 (2H, t,  $J$  = 6 Hz), 3.74 (3H, s), 3.89 (2H, t,  $J$  = 6 Hz), 4.75 (1H, dd,  $J$  = 4.2, 8.4), 5.06-5.15 (3H, m), 5.75 (1H, d,  $J$  = 8.4) 7.36 (5H, bs), 7.40 (1H, s);  $^{13}C$  (75 MHz,  $CDCl_3$ )  $\delta$  15.7, 28.8, 53.0, 57.9, 58.3, 61.6, 67.4, 120.9, 128.1, 128.3, 128.5, 135.5, 135.7, 145.3, 155.8, 169.15; Analysis calculated for  $C_{17}H_{22}N_4O_5$ : C 56.34, H 6.12, N 15.46; Found C 56.32, H 6.10, N 15.43.

**(S)-methyl-2-(((benzyloxy)carbonyl)amino)-3-(4-phenyl-1H-1,2,3-triazol-1-yl)propanoate, 7a:** Yield (85%); white solid; mp- 185°C;  $[\alpha]_D^{25}$  50.1 ( $c$  = 0.14%,  $CHCl_3$ ); IR (Neat), 3337(s), 3062(w), 2958(s), 1531(s), 1453(w), 1439(s), 1766(w), 1348(s), 1312(s), 1270(s), 1221(s), 1173(s), 1147(s), 1076(w), 1069(m), 1047(m), 997(m), 971(s), 930(m), 903(m),  $cm^{-1}$ ;  $^1H$  NMR (300 MHz,  $CDCl_3$ )  $\delta$  3.81 (3H, s), 4.81-4.98 (3H, m), 5.13 (1H, d,  $J$  = 12.3), 5.18 (1H, d,  $J$  = 12.3) 7.33-7.46 (8H, m), 7.66 (1H, m), 7.77-7.80 (2H, m);  $^{13}C$  (75 MHz,  $CDCl_3$ )  $\delta$  50.7, 53.2,

54.1, 67.3, 120.7, 125.7, 128.1, 128.3, 128.5, 128.8, 130.2, 135.9, 147.8, 155.7, 169.1; Analysis calculated for  $C_{20}H_{20}N_4O_4$ : C 63.15, H 5.30, N 14.73; Found C 63.12, H 5.28, N 14.71.

**(S)-methyl 2-(((benzyloxy)carbonyl)amino)-3-(4-(4-chlorophenyl)-1H-1,2,3-triazol-1-yl)propanoate, 8a:** ,Yield (83%); white solid; mp- 202°C;  $[\alpha]_D^{25}$  64.8 ( $c = 0.2\%$ ,  $CHCl_3$ ); I R (Neat), 3331(s), 3144(w), 3047(w), 2958(w), 1733(s), 1682(s), 1532(m), 1484(m), 1453(s), 1439(s), 1367(s), 1146(m), 971(m), 938(m), 875(m), 838(m), 798(m),  $cm^{-1}$ ;  $^1H$  NMR (300 MHz,  $CDCl_3$ )  $\delta$  3.82 (3H, s), 4.77-4.98 (3H, m), 5.13 (1H, d,  $J = 12.3$  Hz), 5.18 (1H, d,  $J = 12.3$  Hz), 7.36-7.41 (7H, m), 7.64 (1H, s), 7.71 (2H, d,  $J = 8.4$ );  $^{13}C$  (75 MHz,  $CDCl_3$ )  $\delta$  50.7, 53.2, 54.1, 67.4, 120.8, 127.0, 128.1, 128.4, 128.6, 128.7, 129.0, 134.11, 135.8, 146.7, 155.6, 169.0; Analysis calculated for  $C_{20}H_{19}ClN_4O_4$ : C 57.90, H 4.62, N 13.51; Found C 57.92, H 4.59, N 13.53.

**(S)-tert-butyl (1-phenyl-3-(4-phenyl-1H-1,2,3-triazol-1-yl)propan-2-yl)carbamate, 9a:** ,Yield (84%); white solid; mp- 169°C;  $[\alpha]_D^{25}$  -11.9 ( $c = 0.21\%$ ,  $CHCl_3$ ); I R (Neat), 3386(s), 3144(w), 3027(w), 2978(w), 2931(s), 1698(s), 1515(s), 1455(m), 1444(m), 1364(m), 1247(s), 1169(s), 1015(m), 980(w), 882(w), 914(w), 885(s), 823(m),  $cm^{-1}$ ;  $^1H$  NMR (300 MHz,  $CDCl_3$ )  $\delta$  1.39 (9H, s), 2.79-2.97 (2H, m), 4.23-4.34 (1H, m), 4.40-4.59 (2H, m), 4.94 (1H, d,  $J = 6.9$ ), 7.19-7.37 (8H, m), 7.76 (1H, s), 7.82-7.85 (2H, m);  $^{13}C$  (75 MHz,  $CDCl_3$ )  $\delta$  28.2, 29.7, 38.0, 52.0, 79.9, 120.8, 125.6, 126.9, 128.1, 128.7, 128.8, 129.3, 130.5, 136.7, 147.6, 155.2; Analysis calculated for  $C_{25}H_{24}N_4O_2$ : C 72.80, H 5.86, N 13.58; Found C 72.78, H 5.83, N 13.55.

**(S)-tert-butyl (1-(4-(4-methoxyphenyl)-1H-1,2,3-triazol-1-yl)-3-phenylpropan-2-yl)carbamate, 10a:** ,Yield (85%); white solid; mp- 189°C;  $[\alpha]_D^{25}$  8.3 ( $c = 0.34\%$ ,  $CHCl_3$ ); I R (Neat), 3365(s), 2981(m), 1686(s), 1522(s), 1499(s), 1455(m), 1444(m), 1367(m), 1357(m), 1276(m), 1247(s), 1171(s), 1058(m), 1029(s), 976(s), 856(m), 834(s), 797(s), 755(s),  $cm^{-1}$ ;  $^1H$  NMR (300 MHz,  $CDCl_3$ )  $\delta$  1.39 (9H, s), 2.78-2.96 (2H, m), 3.85 (3H, s), 4.22-4.35 (1H, m), 4.43-4.58 (2H, m), 4.90 (1H, bs), 6.97(2H, d,  $J = 8.7$  Hz), 7.23-7.37 (5H, m), 7.67 (1H, s), 7.76 (2H, d,  $J = 8.7$  Hz);  $^{13}C$  (75 MHz,  $CDCl_3$ )  $\delta$  27.7, 28.2, 37.9, 52.0, 55.3, 79.9, 114.3, 120.0, 123.2, 126.9, 128.7, 129.3, 136.7, 147.5, 155.2, 159.6; Analysis calculated for  $C_{23}H_{28}N_4O_3$ : C 67.63, H 6.91, N 13.72; Found C 67.61, H 6.88, N 13.69.

**(S)-tert-butyl (1-(4-(4-nitrophenyl)-1H-1,2,3-triazol-1-yl)-3-phenylpropan-2-yl)carbamate, 11a:** ,Yield (71%); white solid; mp- 186°C;  $[\alpha]_D^{25}$  23.1 ( $c = 0.2\%$ ,  $CHCl_3$ ); I R (Neat), 3367(m), 3137(w), 3060(w), 2982(w), 2933(w), 1686(s), 1607(s), 1516(s), 1339(s), 1274(m), 1248(s), 1167(s), 1110(m), 1060(m), 1045(m), 853(s), 754(s), 700(s), 629(s),  $cm^{-1}$ ;  $^1H$  NMR (300 MHz,  $CDCl_3$ )  $\delta$  1.39 (9H, s), 2.84-3.00 (2H, m), 4.25-4.36 (1H, m), 4.50-4.65 (2H, m), 4.74 (1H, bs), 7.25-7.39 (5H, m), 7.92 (1H, s), 8.00 (2H, d,  $J = 9$  Hz), 8.31 (2H, d,  $J = 9$  Hz);  $^{13}C$  (75 MHz,  $CDCl_3$ )  $\delta$  28.2, 29.6, 38.1, 52.0, 60.3, 80.2, 122.2, 124.3, 126.0, 127.1, 128.8, 129.2, 136.3, 136.3, 136.7, 145.5, 147.3, 155.2; Analysis calculated for  $C_{22}H_{25}N_5O_4$ : C 62.40, H 5.95, N 16.54; Found C 62.38, H 5.92, N 16.57.

**(S)-tert-butyl (1-phenyl-3-(4-(p-tolyl)-1H-1,2,3-triazol-1-yl)propan-2-yl)carbamate, 12a:** ,Yield (85%); white solid; mp- 182°C;  $[\alpha]^{25}_{\text{D}}$  2.1 ( $c = 0.25\%$ ,  $\text{CHCl}_3$ ); I R (Neat), 3372(s), 3128(w), 3066(w), 2981(m), 2936(m), 1720(S), 1686(s), 1545(m), 1518(s), 1495(m), 1457(m), 1446(m), 1390(m), 1366(m), 1218(s), 1168(s), 1059(m), 1025(m), 1042(m), 910(m), 835(m), 843(m), 776(s), 730(s), 700(s),  $\text{cm}^{-1}$ ;  $^1\text{H}$  NMR (300 MHz,  $\text{CDCl}_3$ )  $\delta$  1.40 (9H, s), 2.40 (3H, s), 2.79-2.96 (2H, m), 4.22-4.34 (1H, m), 4.44-4.59 (2H, m), 4.87 (1H, bs), 7.24-7.38 (7H, m), 7.71 (1H, s), 7.73 (2H, d,  $J = 5.4$  Hz);  $^{13}\text{C}$  (75 MHz,  $\text{CDCl}_3$ )  $\delta$  21.2, 28.2, 31.2, 37.9, 52.0, 80.0, 120.4, 125.6, 126.9, 127.6, 128.7, 129.3, 129.5, 136.7, 138.0, 147.7, 155.2; Analysis calculated for  $\text{C}_{23}\text{H}_{28}\text{N}_4\text{O}_2$ : C 70.38, H 7.19, N 14.27; Found C 70.341, H 7.21, N 14.25.

**(S)-ethyl 1-(2-((tert-butoxycarbonyl)amino)-3-phenylpropyl)-1H-1,2,3-triazole-4-carboxylate, 13a:** ,Yield (79%); white solid; mp- 145°C;  $[\alpha]^{25}_{\text{D}}$  -7.29 ( $c = 0.38\%$ ,  $\text{CHCl}_3$ ); I R (Neat)- 3369(m), 3945(w), 2980(m), 2928(m), 1687(s), 1521(s), 1448(s), 1359(s), 1250(s), 1168(s), 1045(s), 856(m), 796(s), 756(s), 702(s), 626(s),  $\text{cm}^{-1}$ ;  $^1\text{H}$  NMR (300 MHz,  $\text{CDCl}_3$ )  $\delta$  1.37 (9H, s), 1.40 (3H, t,  $J = 7.2$  Hz), 2.79-2.94 (2H, m), 4.16-4.27 (1H, m), 4.41 (2H, q,  $J = 7.2$  Hz), 4.53-4.67 (2H, m), 7.75(1H, d,  $J = 7.2$  Hz), 7.19-7.35 (5H, m);  $^{13}\text{C}$  (75 MHz,  $\text{CDCl}_3$ )  $\delta$  14.2, 28.2, 31.2, 37.9, 52.1, 61.2, 80.1, 127.0, 128.5, 128.8, 129.2, 136.3, 140.1, 155.1, 160.6; Analysis calculated for  $\text{C}_{19}\text{H}_{26}\text{N}_4\text{O}_4$ : C 60.95, H 7.00, N 14.96; Found C 60.92, H 7.02, N 14.98.

**tert-butyl ((2R,3S)-3-methyl-1-(4-phenyl-1H-1,2,3-triazol-1-yl)pentan-2-yl)carbamate, 14a:** ,Yield (85%); white solid; mp- 156°C;  $[\alpha]^{25}_{\text{D}}$  16.9 ( $c = 0.23\%$ ,  $\text{CHCl}_3$ ); I R (Neat), 3364(m), 3129(w), 2967(m), 2940(m), 2877(w), 1686(s), 1518(s), 1464(m), 1449(m), 1366(m), 1277(m), 1252(m), 1231(m), 1177(m), 1252(m), 1231(m), 1172(s), 1157(s), 1082(w), 1045(w), 977(m), 855(m), 778(m), 764(s), 739(m), 710(m), 694(s),  $\text{cm}^{-1}$ ;  $^1\text{H}$  NMR (300 MHz,  $\text{CDCl}_3$ )  $\delta$  0.94 (3H, t,  $J = 7.5$  Hz), 1.03 (3H, d,  $J = 6.6$ ), 1.12-1.27 (1H, m), 1.36 (9H, s), 1.49-1.69 (2H, m), 3.89-3.98 (1H, m), 4.54 (2H, bd,  $J = 5.1$ ), 4.75 (1H, d,  $J = 8.7$ ), 7.28-7.44 (3H, m), 7.81-7.84 (3H, m);  $^{13}\text{C}$  (75 MHz,  $\text{CDCl}_3$ )  $\delta$  11.2, 15.6, 24.9, 28.2, 36.3, 51.4, 54.9, 79.7, 120.3, 125.6, 128.0, 128.7, 130.6, 147.7, 155.5; Analysis calculated for  $\text{C}_{19}\text{H}_{28}\text{N}_4\text{O}_2$ : C 66.25, H 8.19, N 16.27; Found C 66.22, H 8.17, N 16.25.

**tert-butyl ((2R,3S)-1-(4-(4-methoxyphenyl)-1H-1,2,3-triazol-1-yl)-3-methylpentan-2-yl)carbamate, 15a:** ,Yield (86%); white solid; mp- 160°C;  $[\alpha]^{25}_{\text{D}}$  14.9 ( $c = 0.32\%$ ,  $\text{CHCl}_3$ ); I R (Neat), 3351(m), 3147(w), 2967(m), 2936(m), 2876(w), 1682(s), 1619(w), 1523(s), 1457(s), 1170(s), 1026(s), 976(w), 835(m), 804(m), 743(m), 648(s), 612(m),  $\text{cm}^{-1}$ ;  $^1\text{H}$  NMR (300 MHz,  $\text{CDCl}_3$ )  $\delta$  0.93 (3H, J = 7.2 Hz), 1.03 (3H, d,  $J = 6.6$ ), 1.21-1.28 (1H, m), 1.37 (9H, s), 1.48-1.65 (2H, m), 3.84 (3H, s), 3.87-3.95 (1H, m), 5.52 (2H, d,  $J = 5.4$ ), 4.74 (1H, d,  $J = 8.7$  Hz), 6.96 (2H, d,  $J = 9$  Hz), 7.35 (1H, s), 7.75 (2H, d,  $J = 9$  Hz);  $^{13}\text{C}$  (75 MHz,  $\text{CDCl}_3$ )  $\delta$  11.2, 15.6, 24.9, 28.2, 36.3, 51.3, 54.9, 55.3, 79.7, 114.2, 119.5, 123.3, 126.9, 147.6, 155.5, 159.5; Analysis calculated for  $\text{C}_{20}\text{H}_{30}\text{N}_4\text{O}_3$ : C 64.15, H 8.07, N 14.96; Found C 64.13, H 8.04, N 14.93.

**tert-butyl-((2R,3S)-3-methyl-1-(4-(4-nitrophenyl)-1H-1,2,3-triazol-1-yl)pentan-2-yl)carbamate, 16a:** Yield (72%); white solid; mp- 183°C;  $[\alpha]^{25}_{\text{D}}$  37.5 ( $c = 0.18\%$ ,  $\text{CHCl}_3$ ); I R

(Neat), 3344(m), 2960(m), 2931(m), 2878(w), 1676(s), 1608(s), 1512(s), 1459(m), 1443(m), 1353(s), 1341(s), 1276(m), 1231(m), 1156(s), 1109(m), 1058(w), 754(s), 690(m), 657(s).cm<sup>-1</sup> ; <sup>1</sup>H NMR (300 MHz, CDCl<sub>3</sub>)  $\delta$  0.96 (3H, t,  $J$  = 7.2 Hz), 1.05 (3H, d,  $J$  = 6.6 Hz), 1.18-1.28 (1H, m), 1.34 (9H, s), 1.55-1.71 (2H, m), 3.93-4.02 (1H, m), 4.49-4.69 (3H, m), 7.99 (2H, d,  $J$  = 9 Hz), 8.01 (1H, s), 8.29 (2H, d,  $J$  = 9 Hz); <sup>13</sup>C (75 MHz, CDCl<sub>3</sub>)  $\delta$  11.2, 15.6, 25.0, 28.1, 36.6, 51.0, 54.9, 79.9, 121.9, 124.2, 126.0, 136.9, 145.5, 147.3, 155.5; Analysis calculated for C<sub>19</sub>H<sub>27</sub>N<sub>5</sub>O<sub>4</sub>: C 58.60, H 6.99, N 17.98; Found. C 58.63, H 6.96, N 17.95.



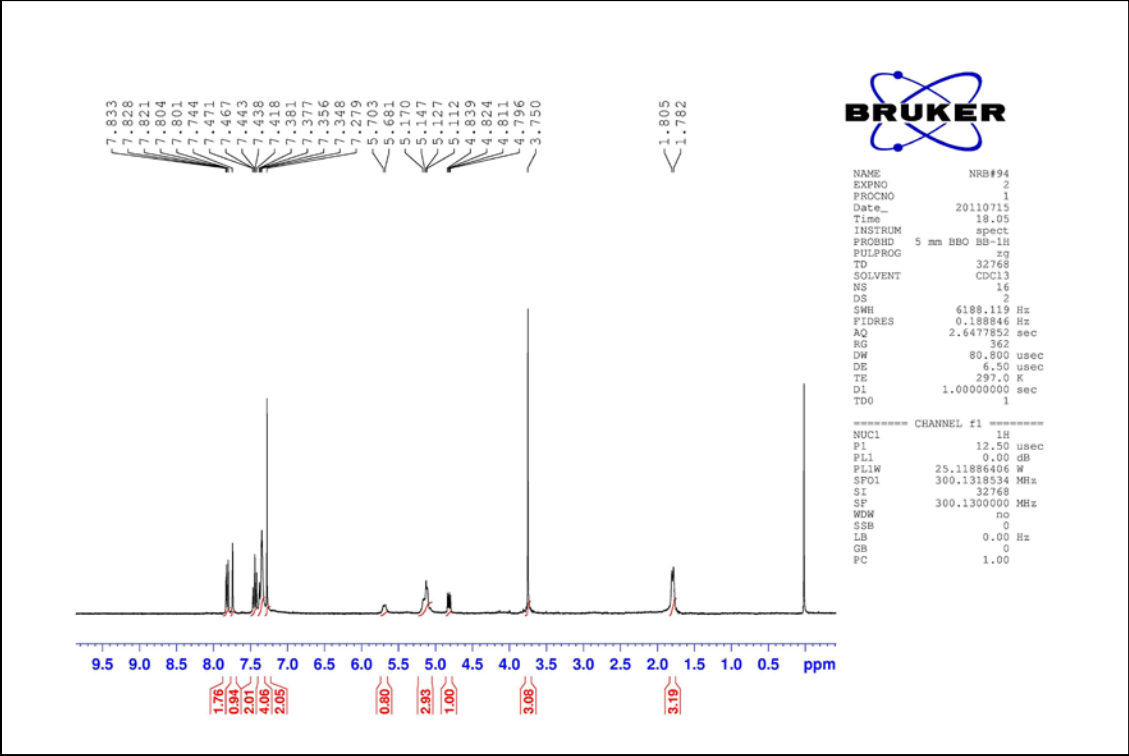

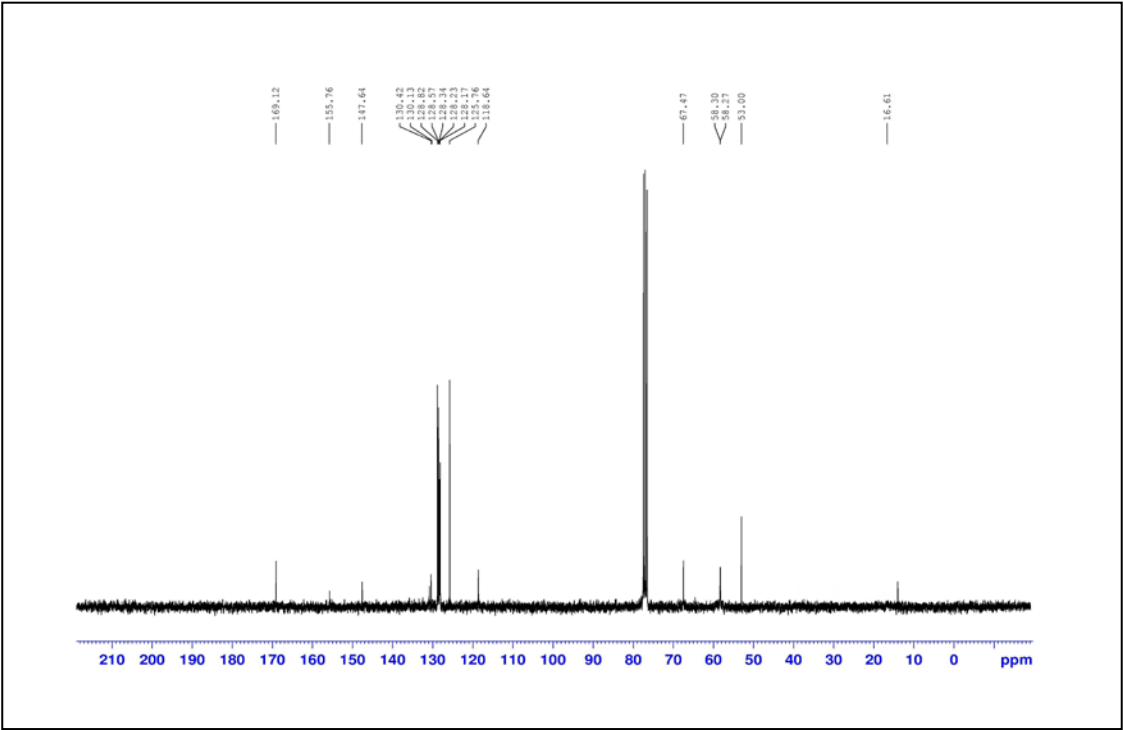

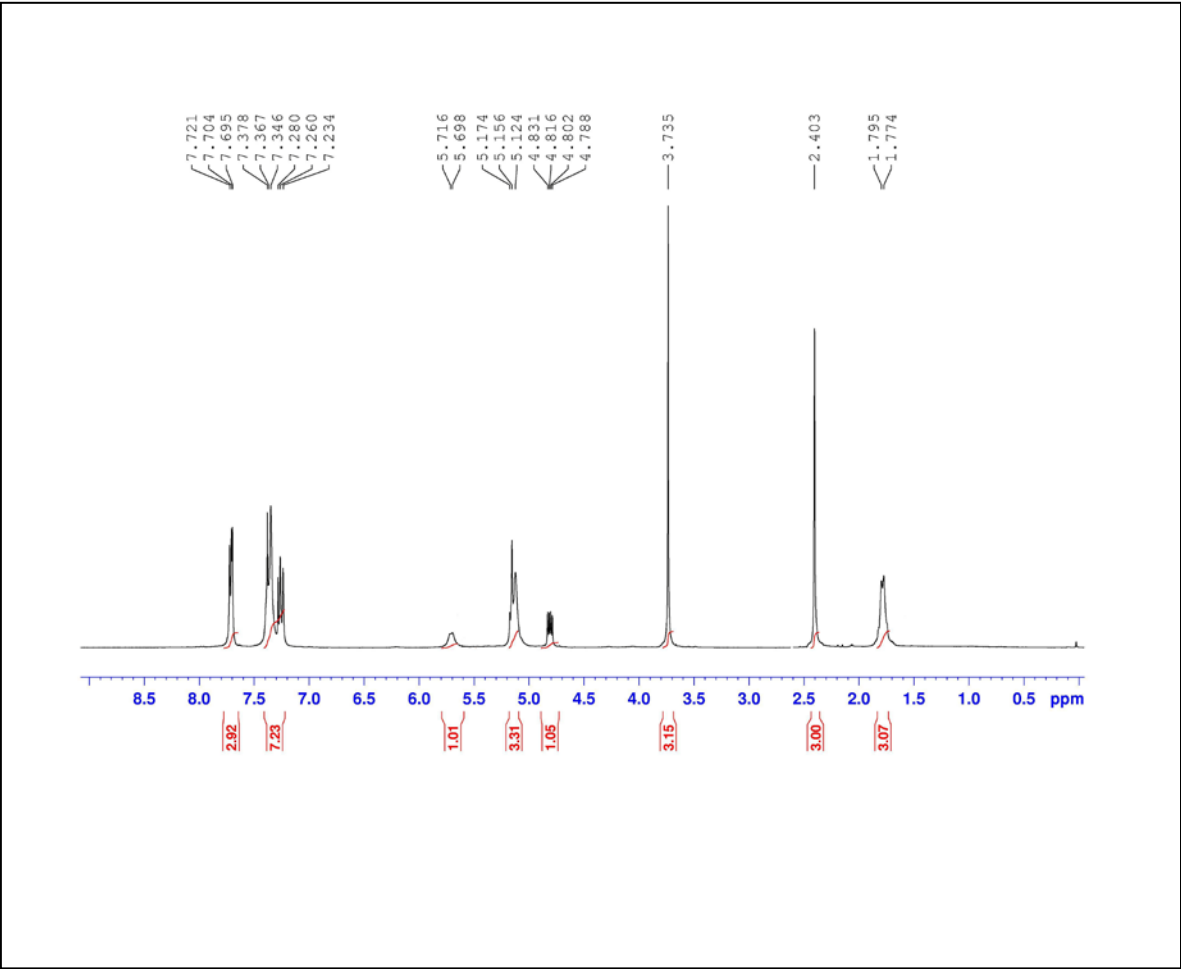

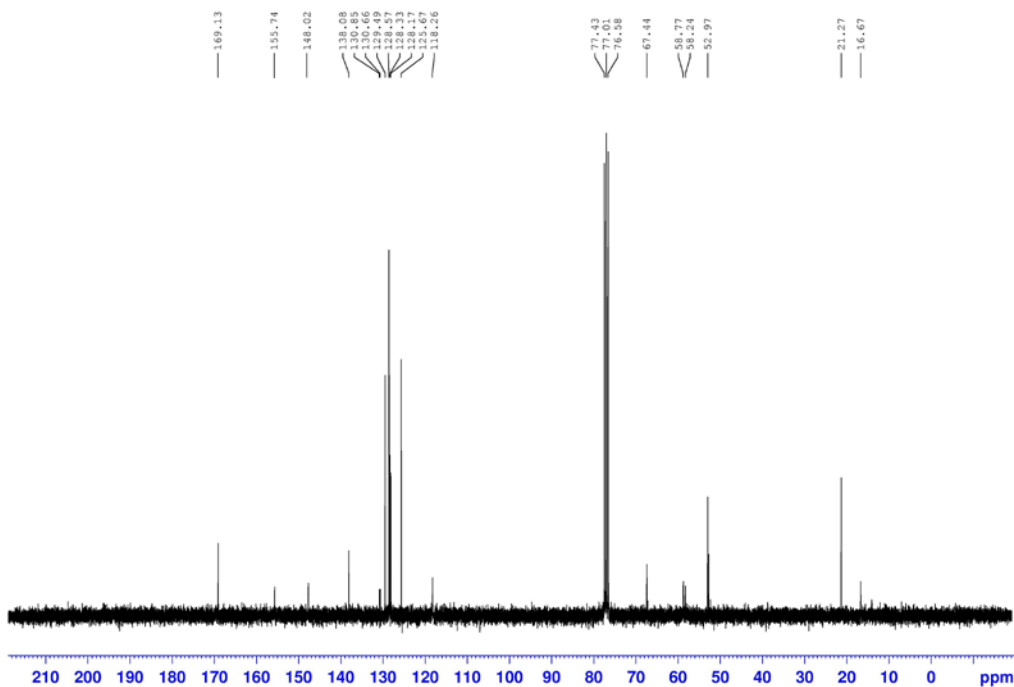

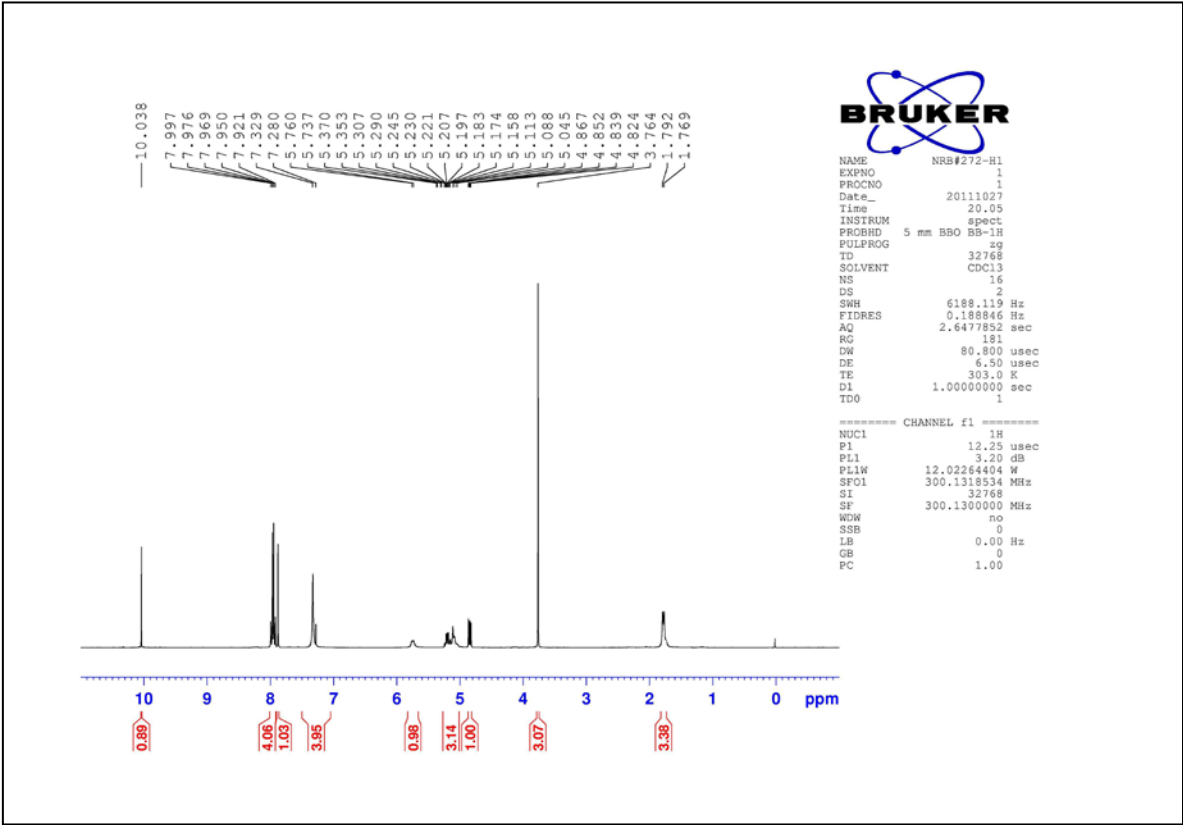

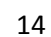

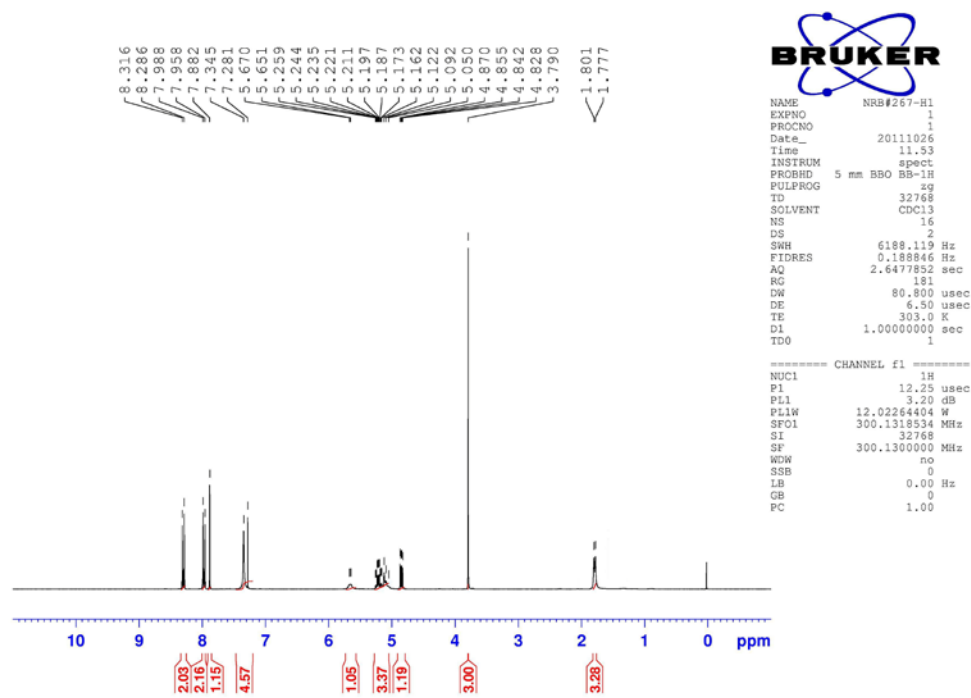

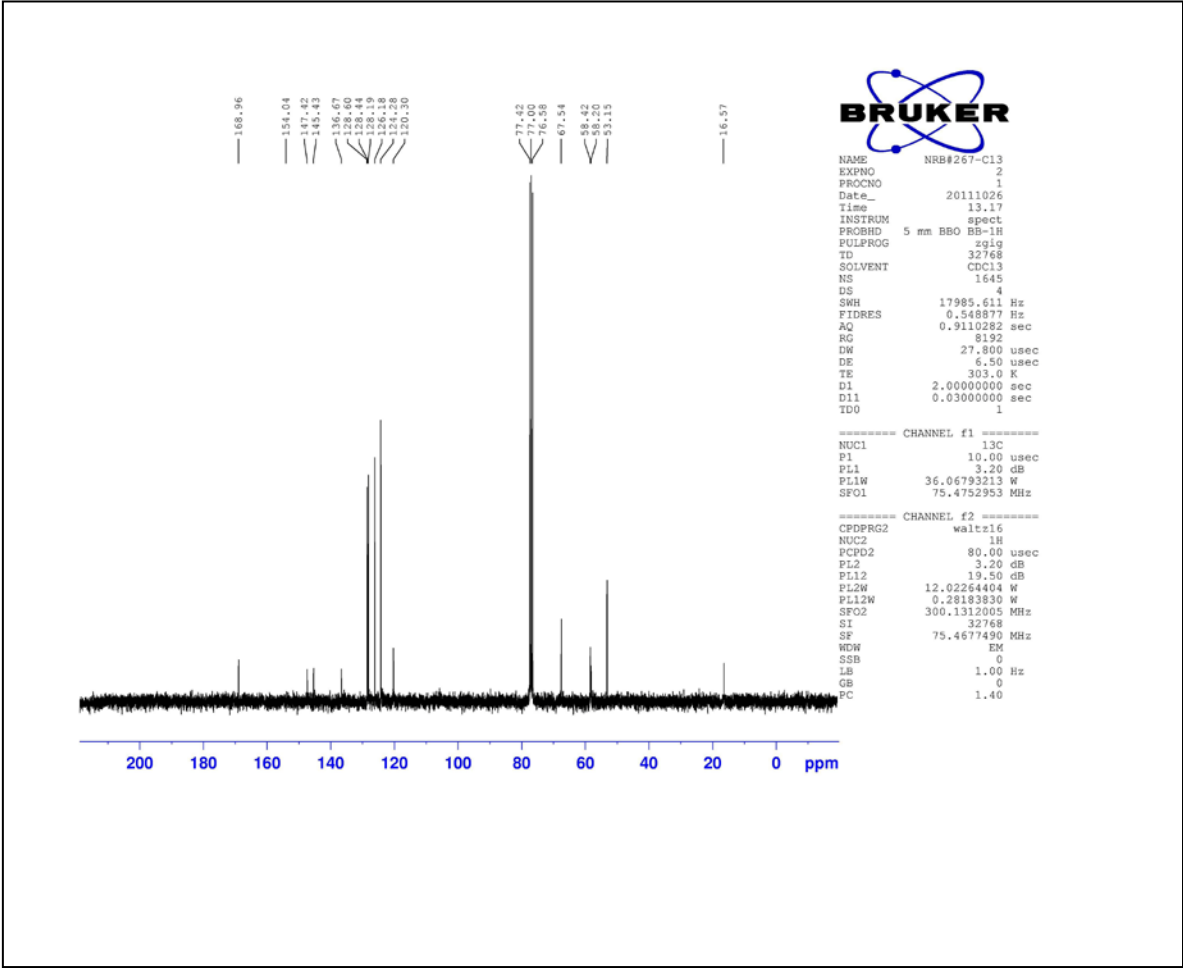



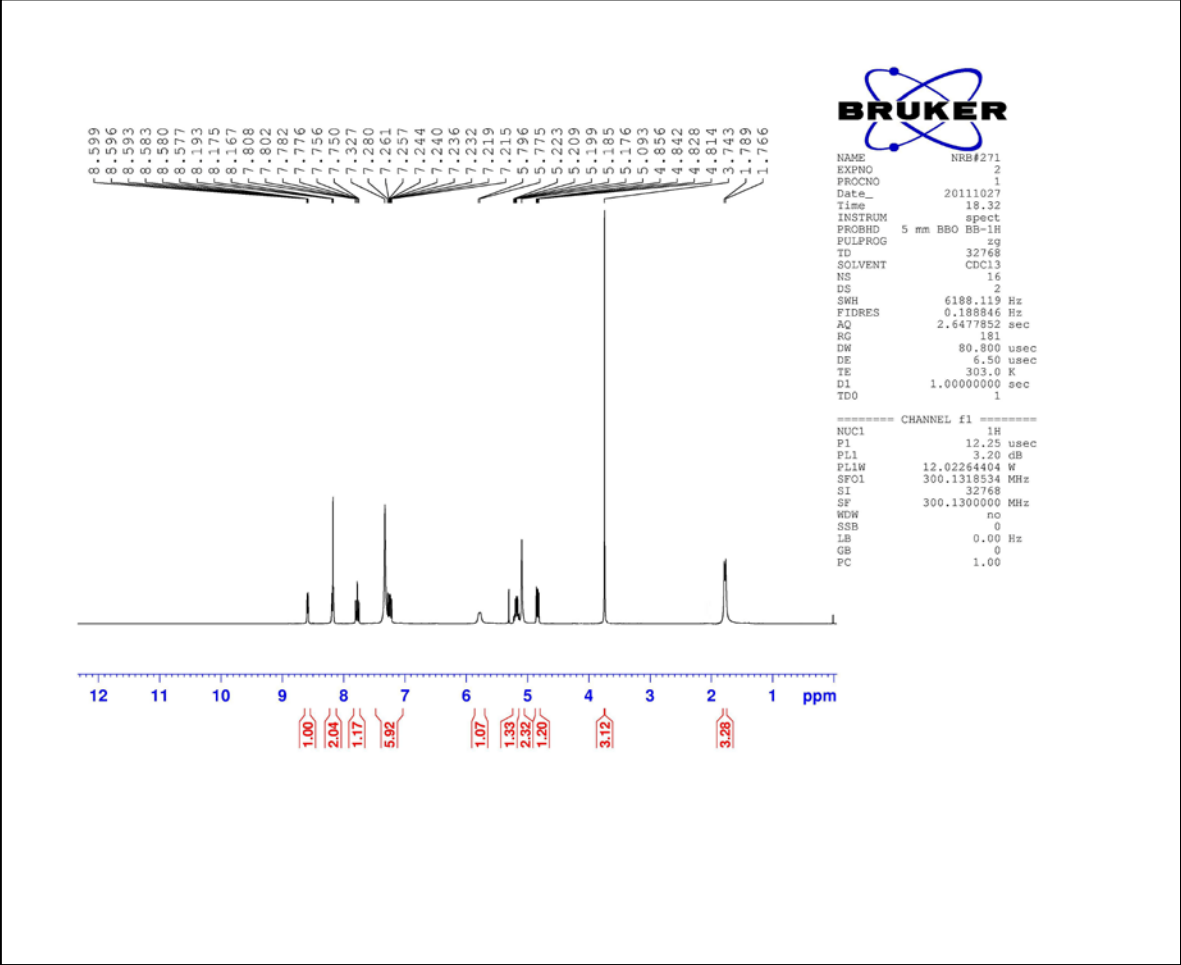

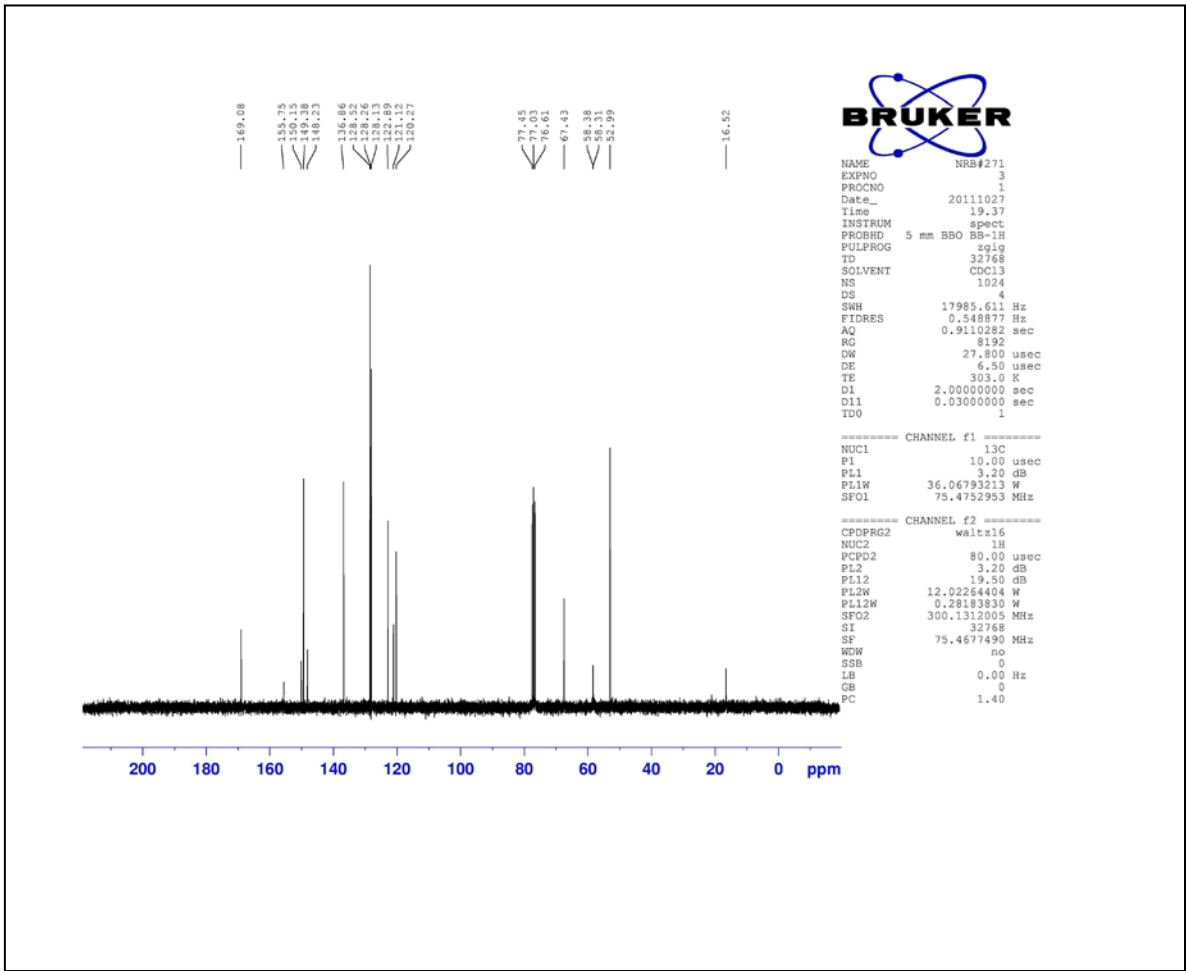

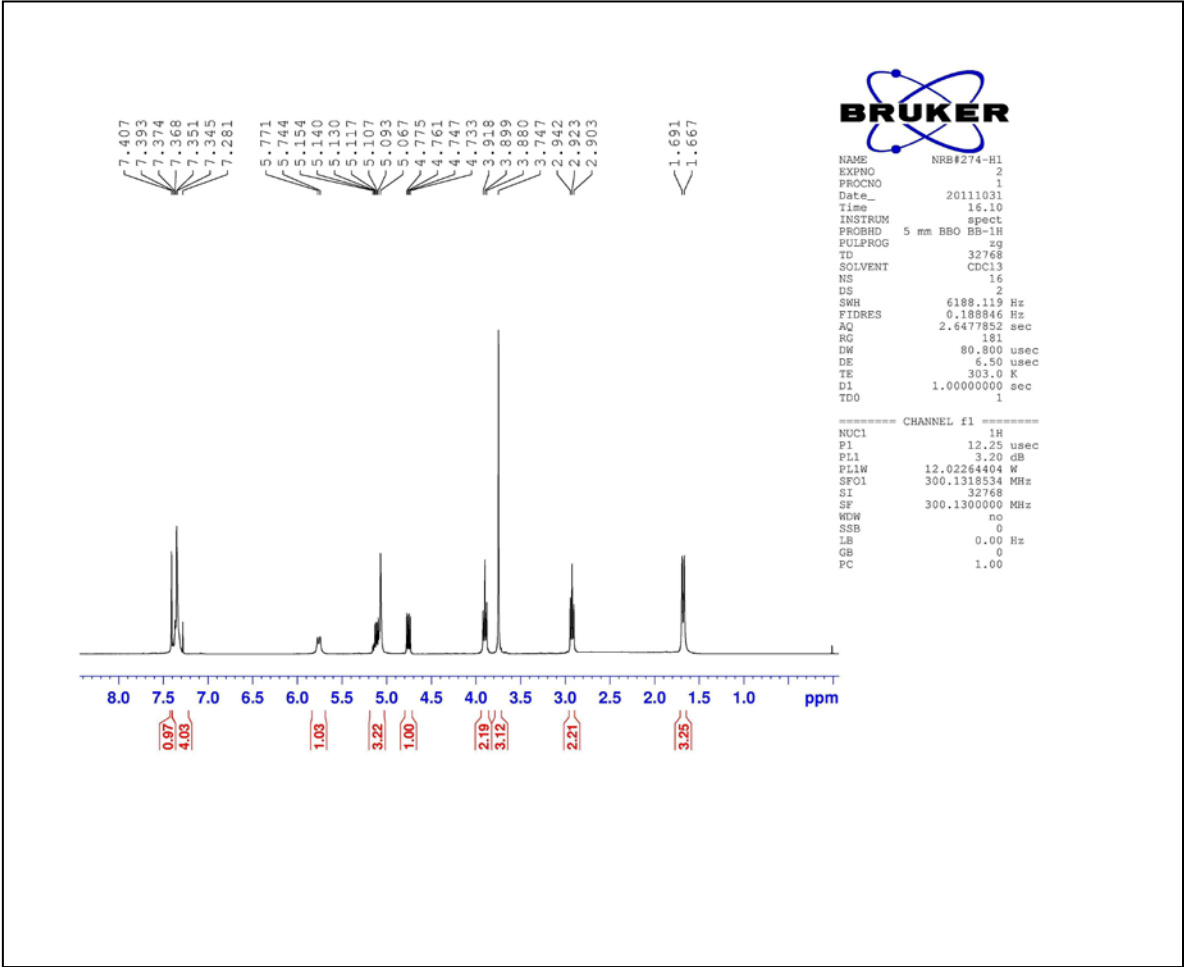

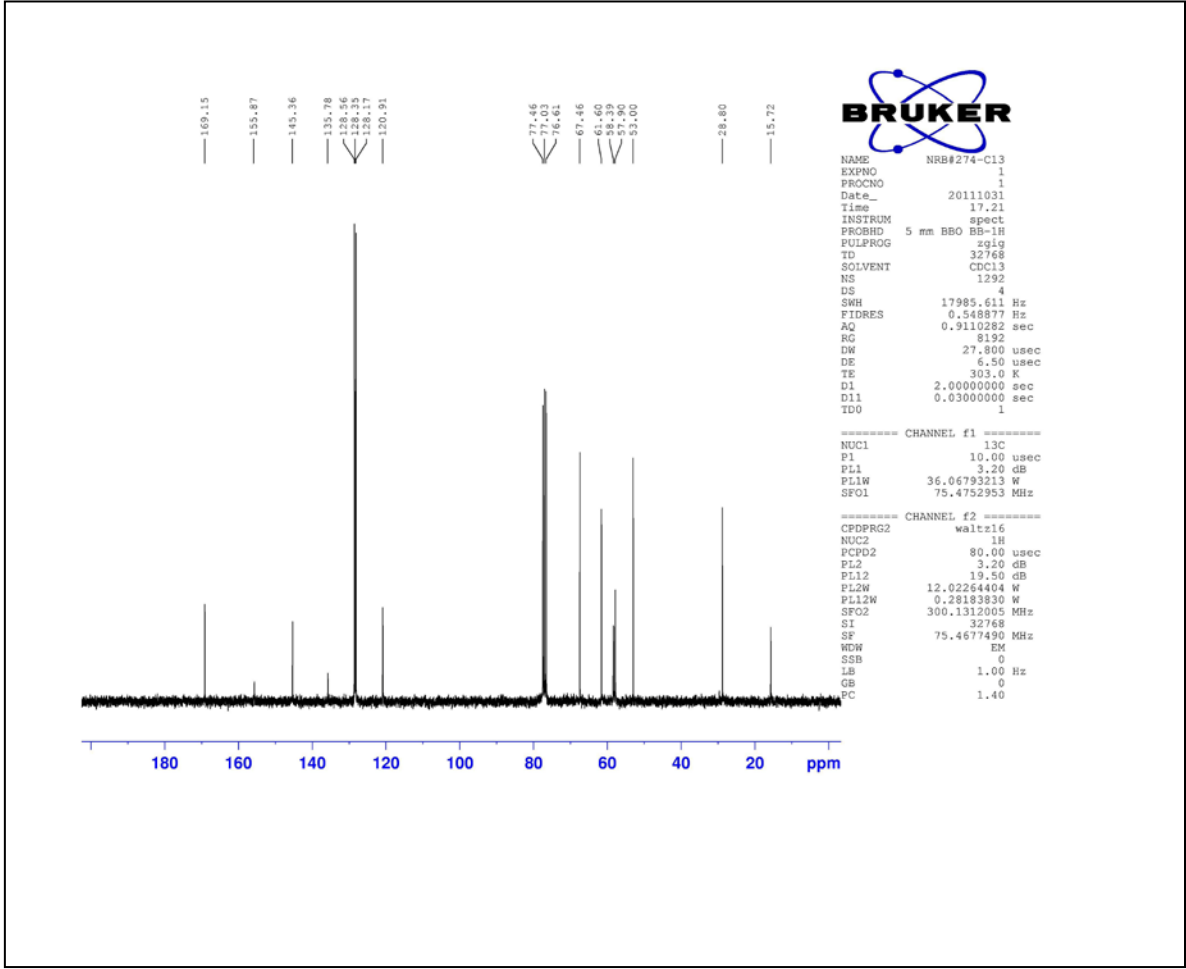

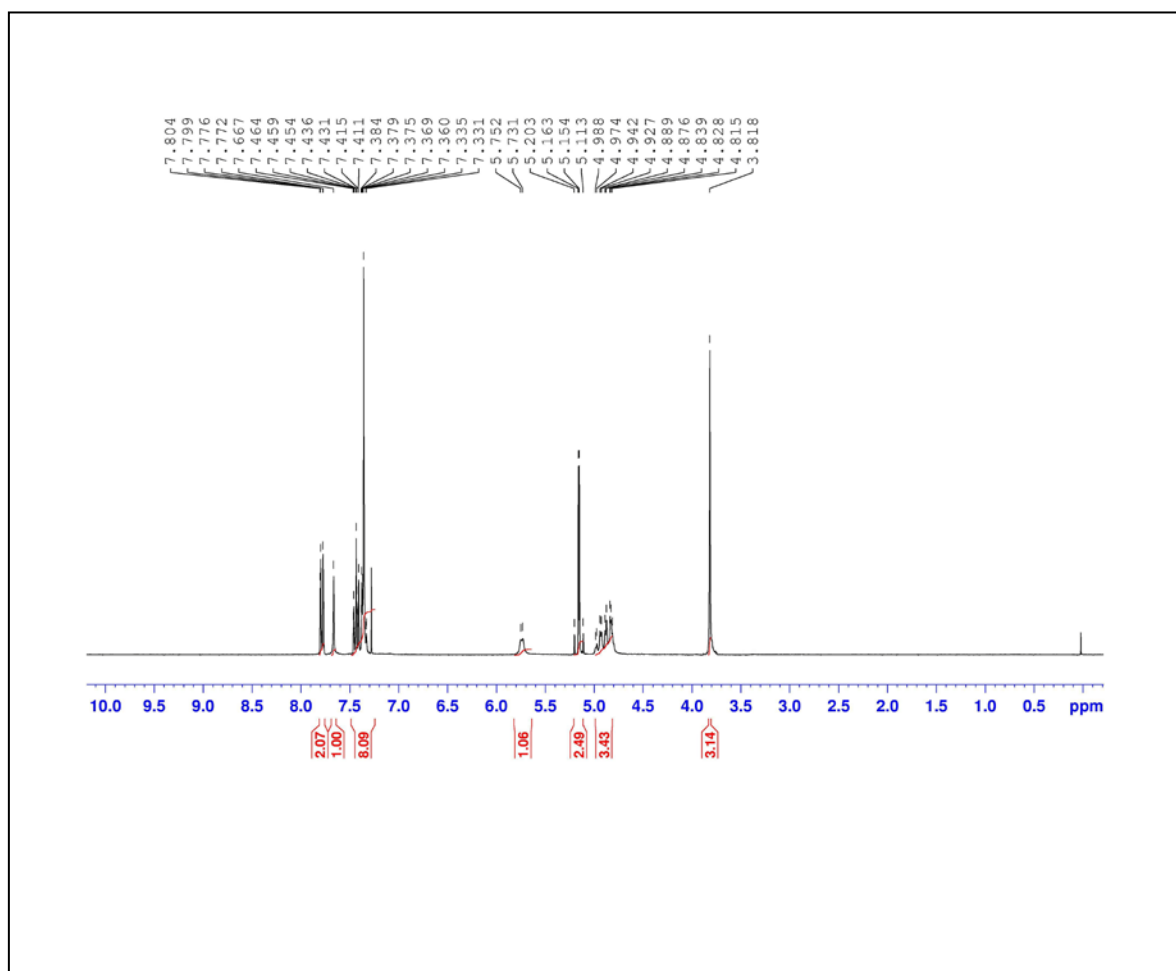

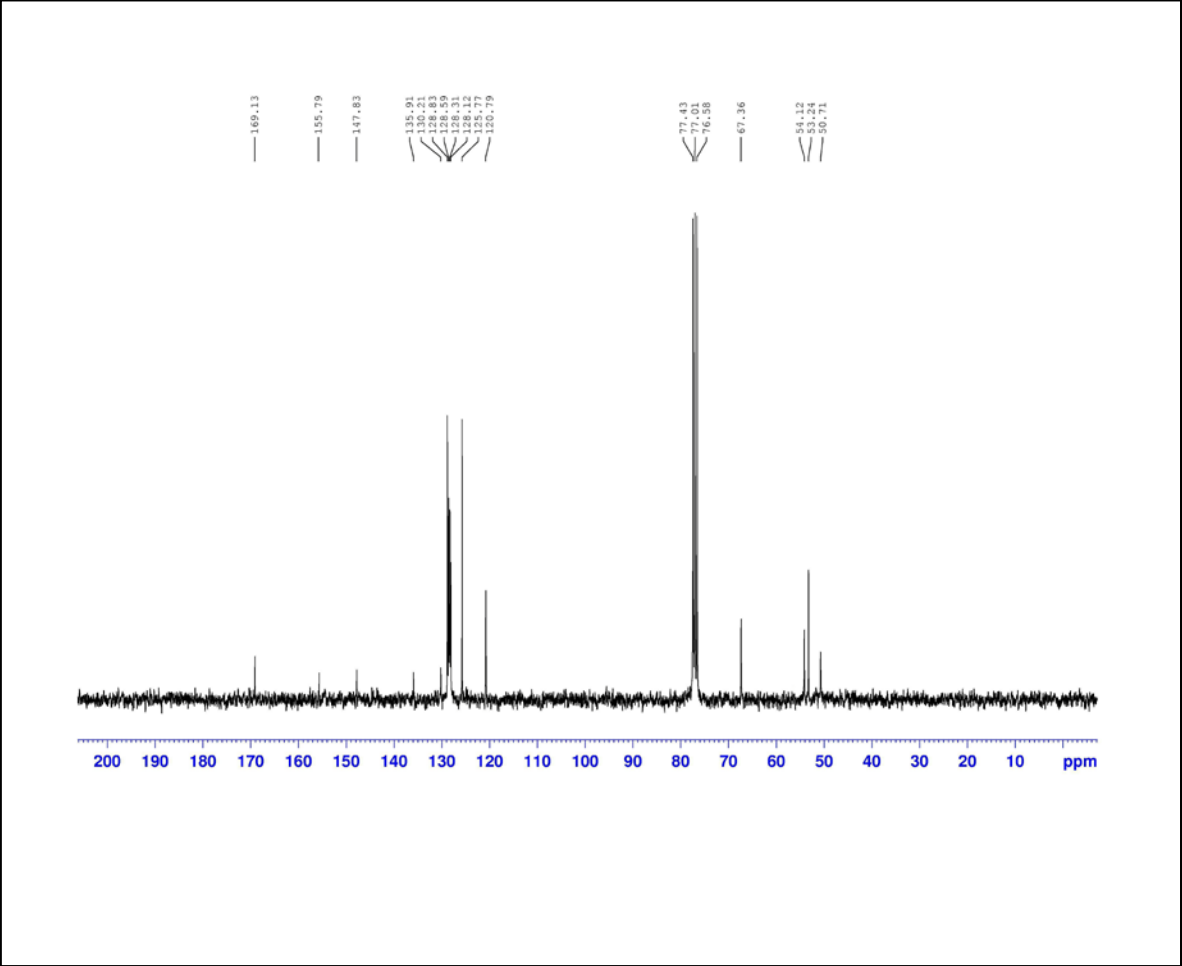

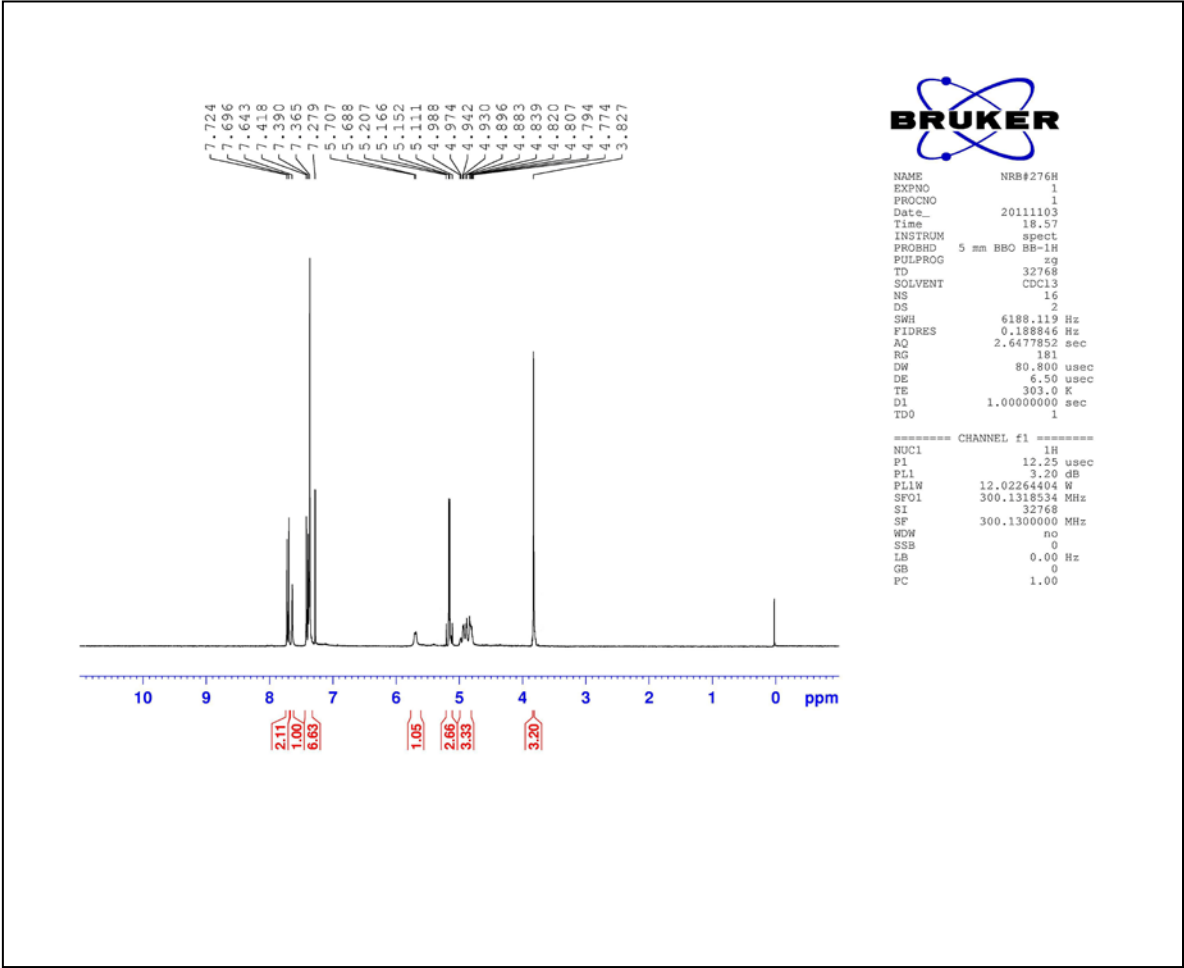

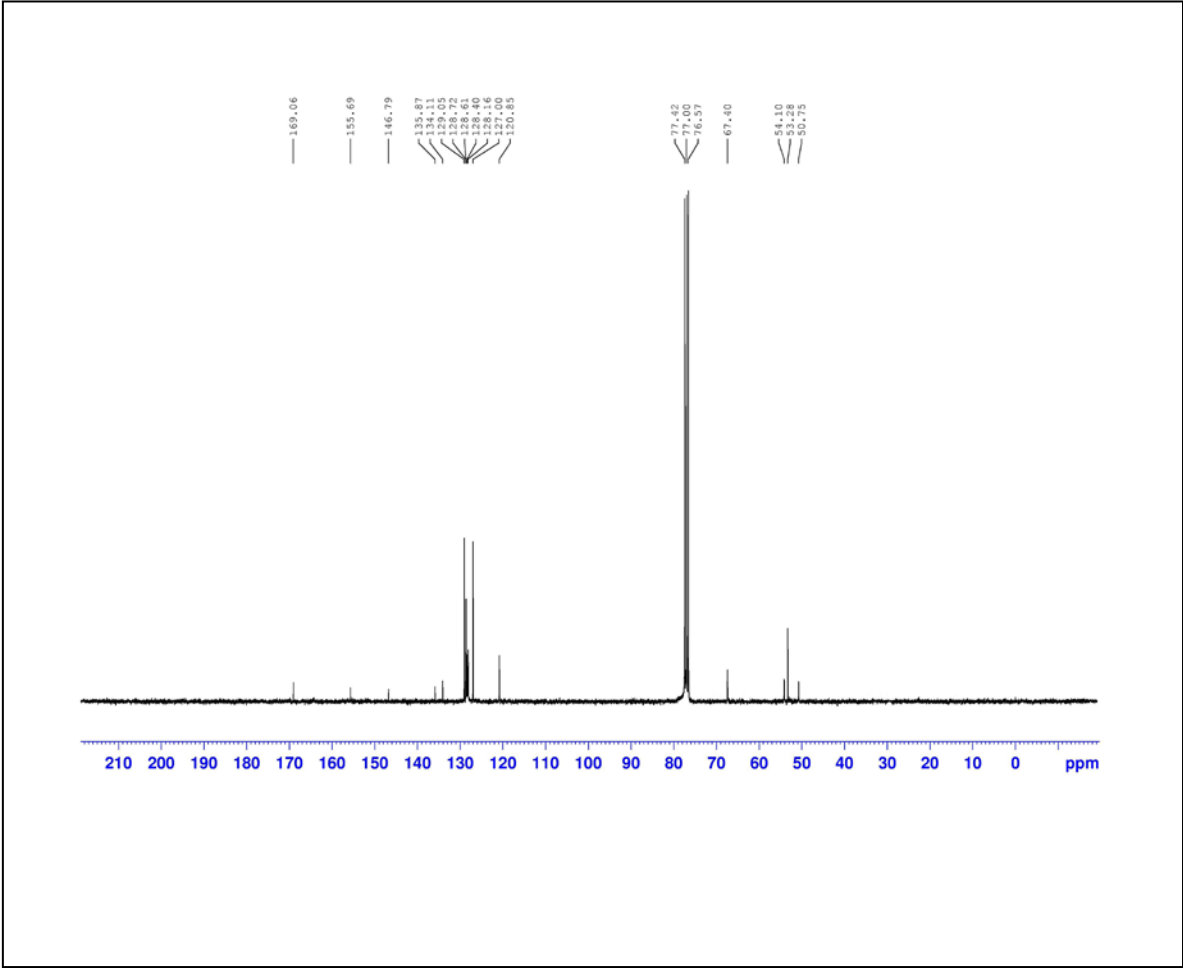



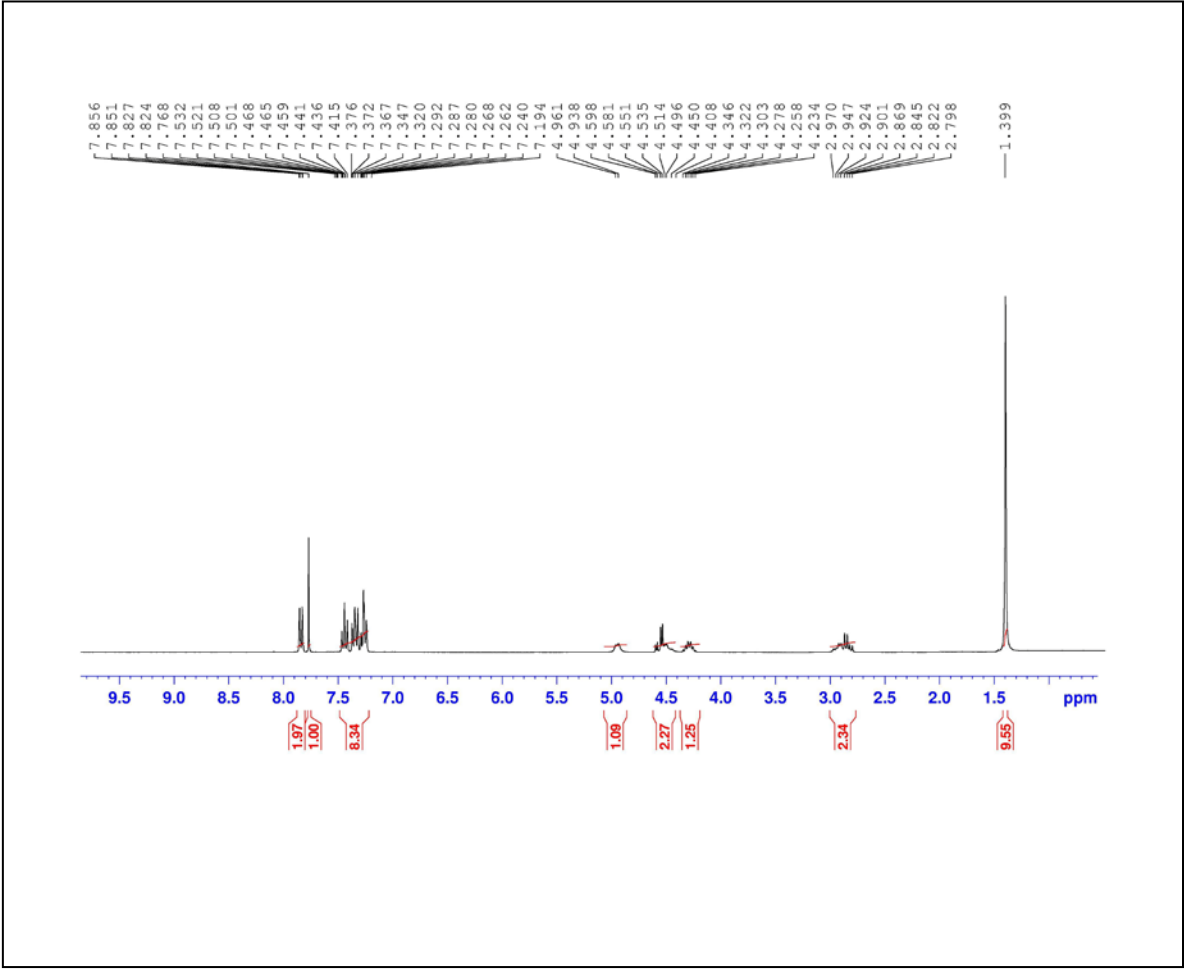

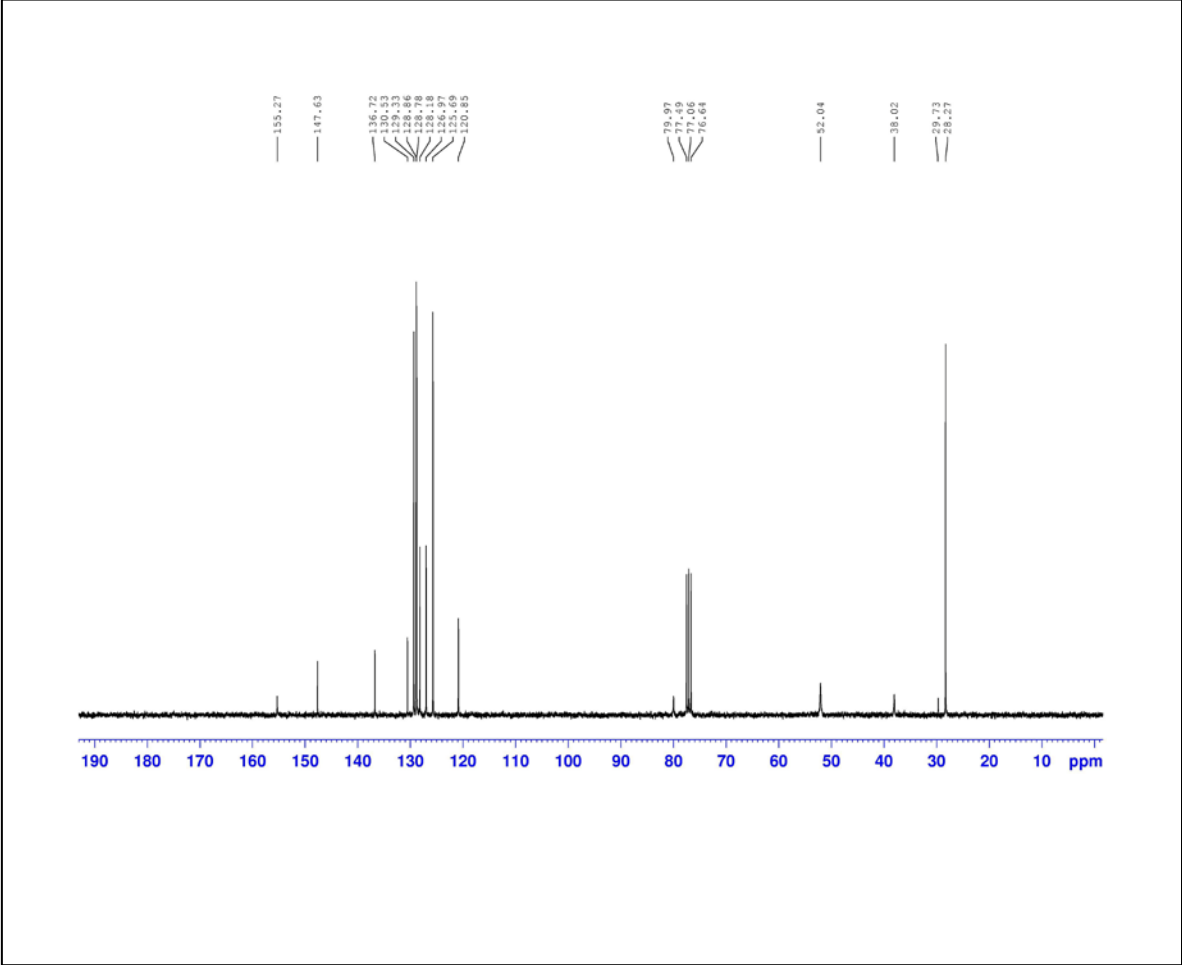

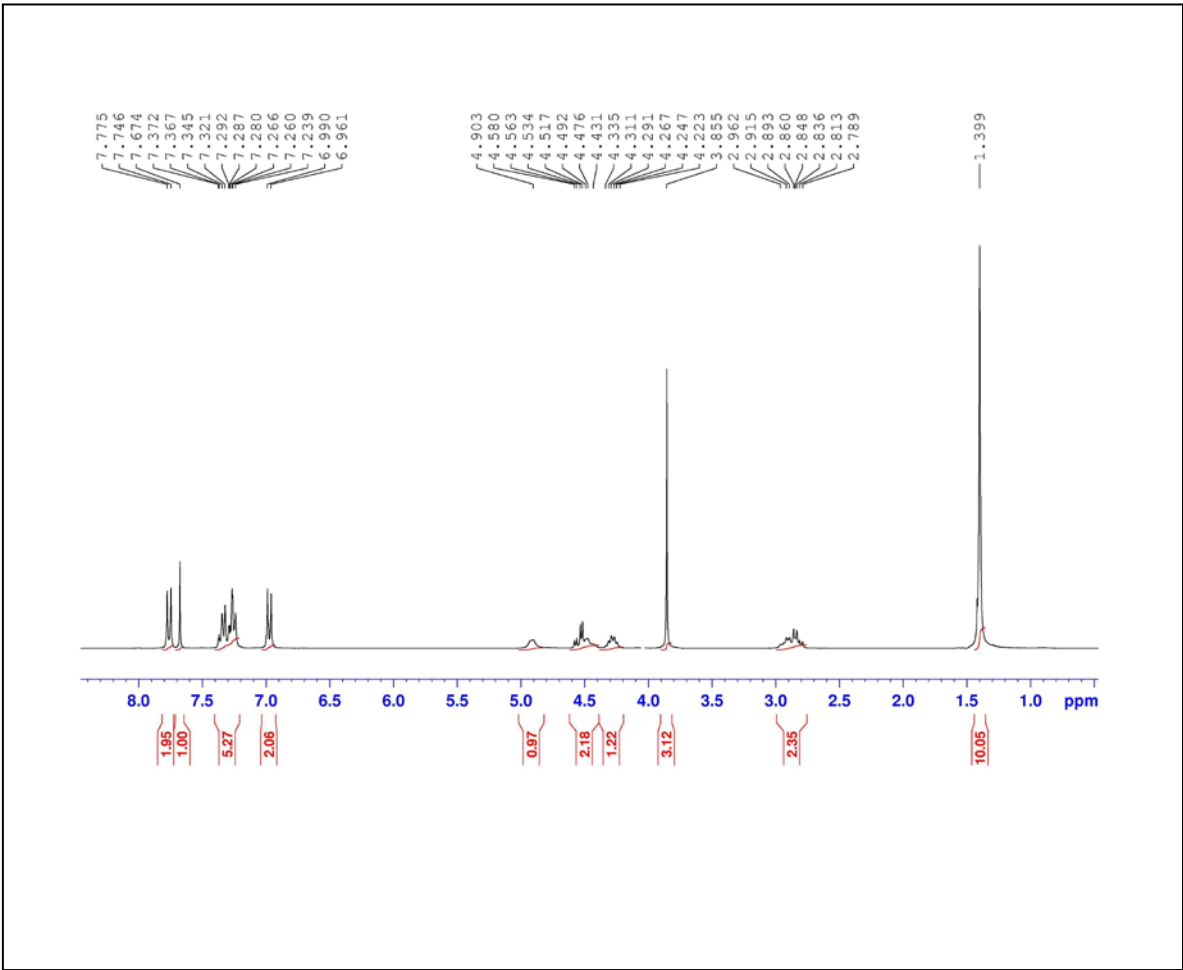

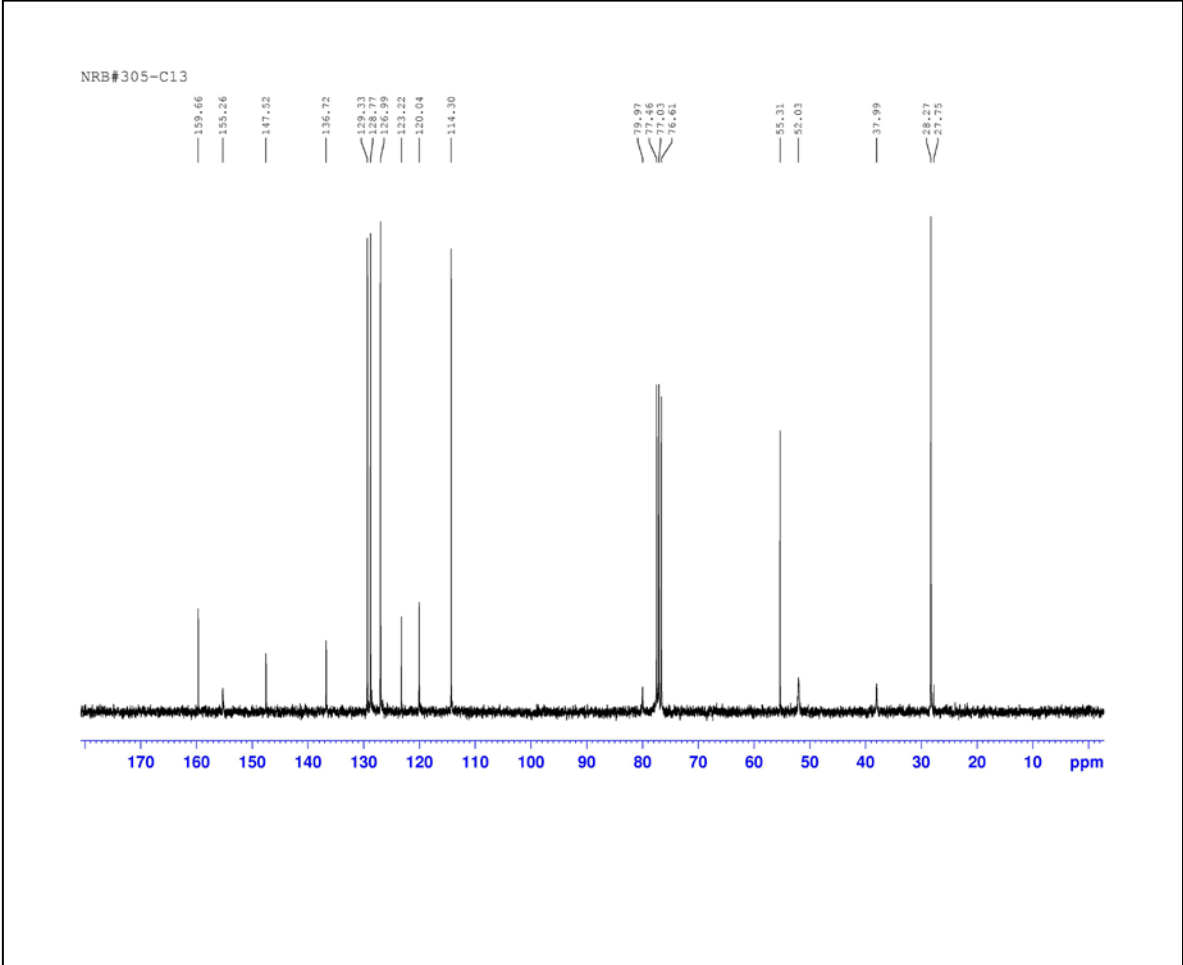

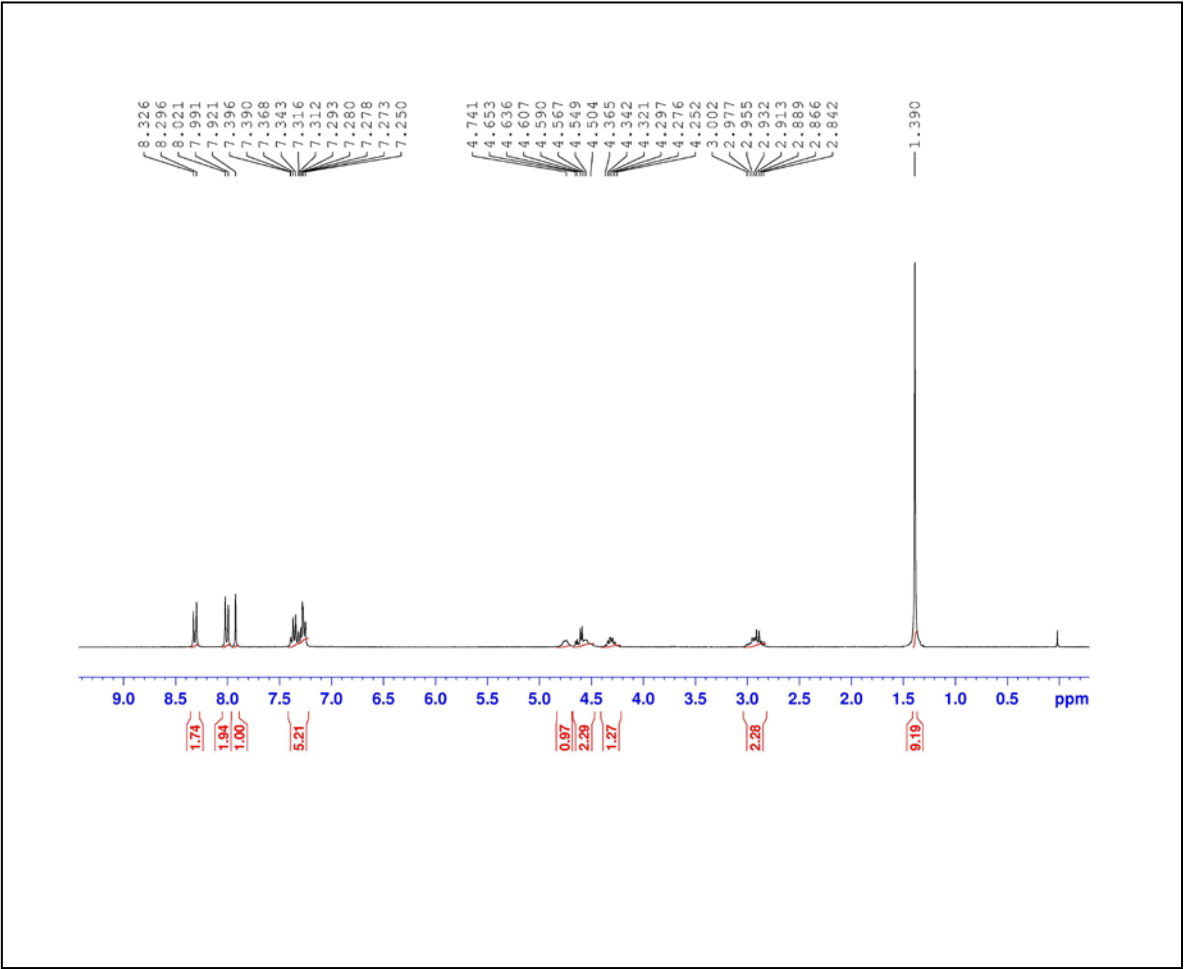

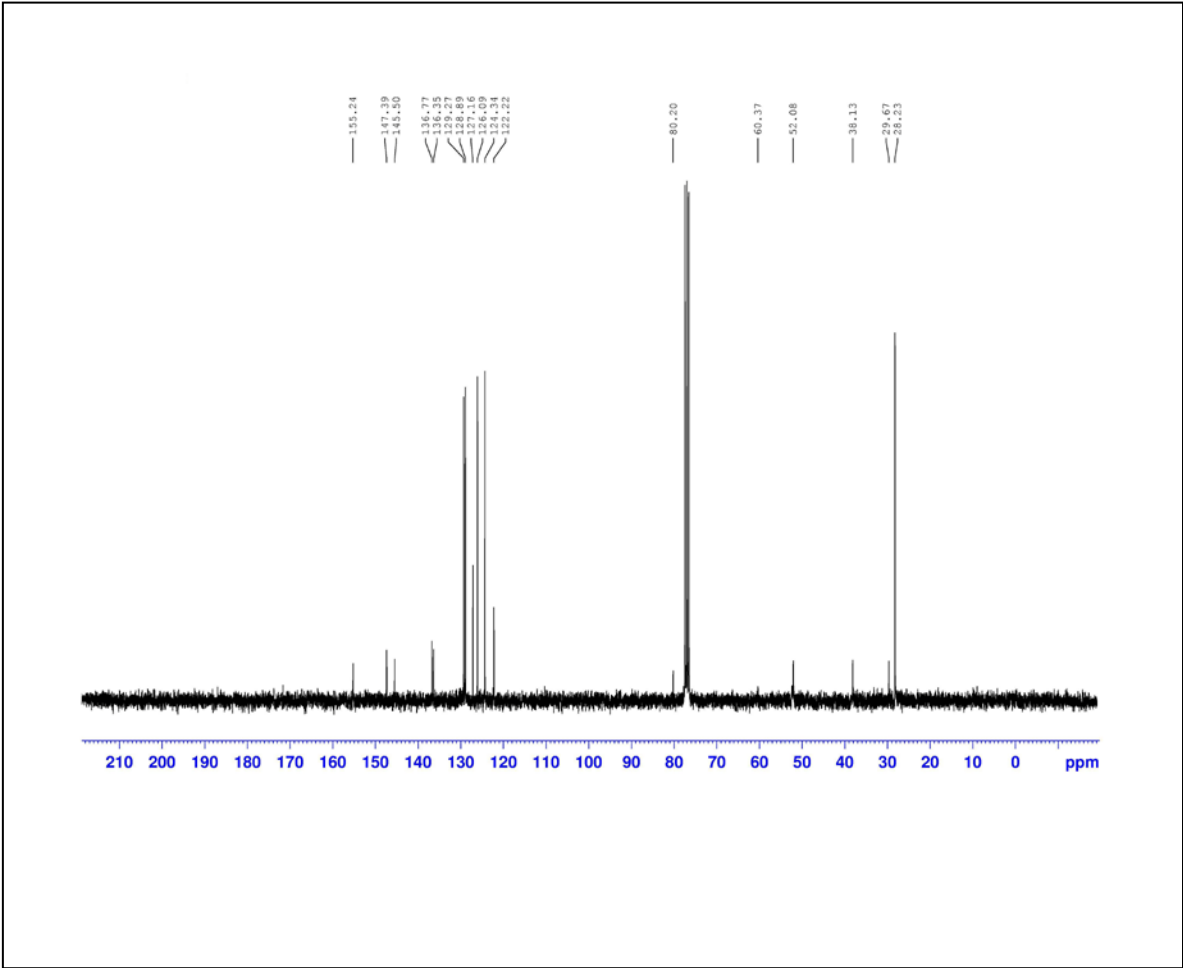

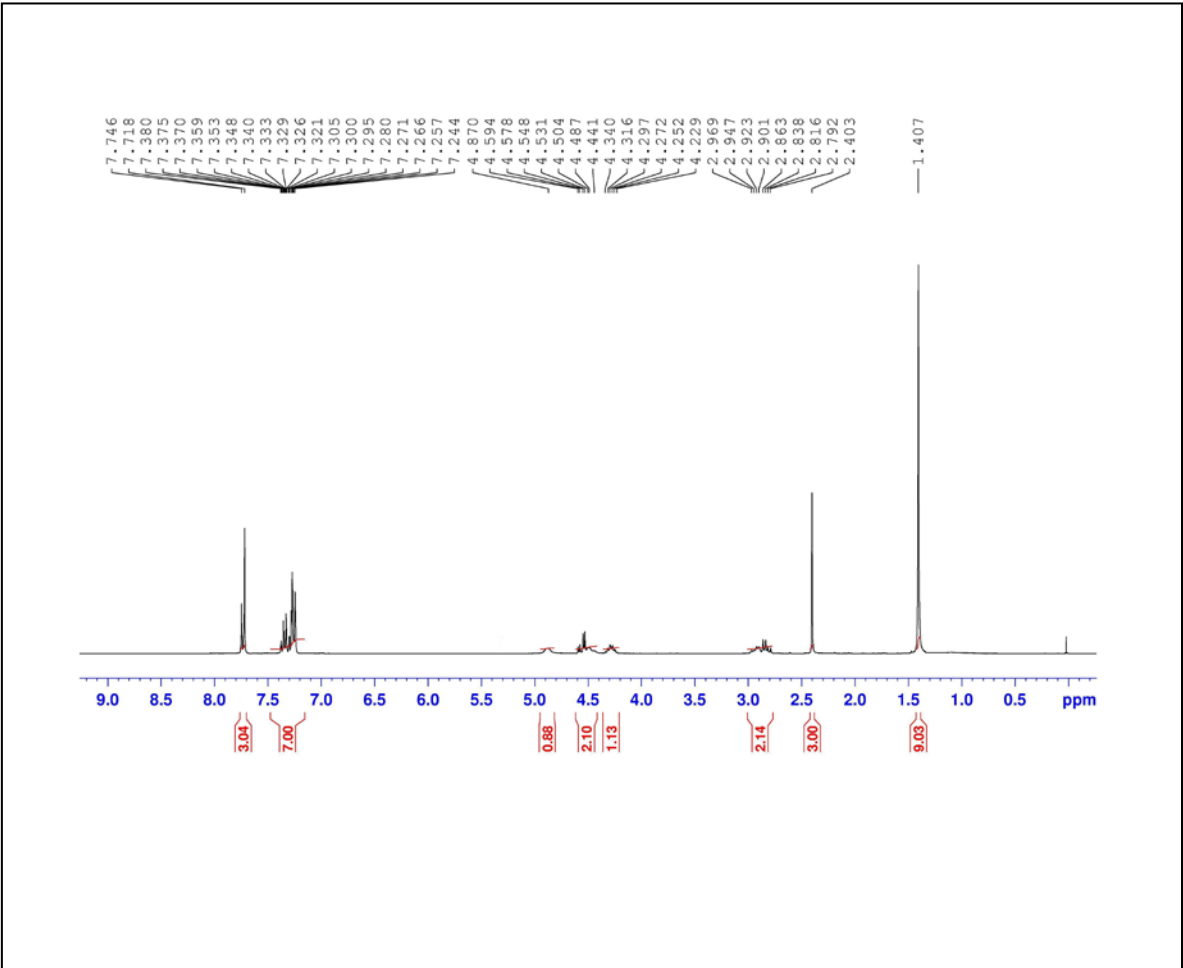

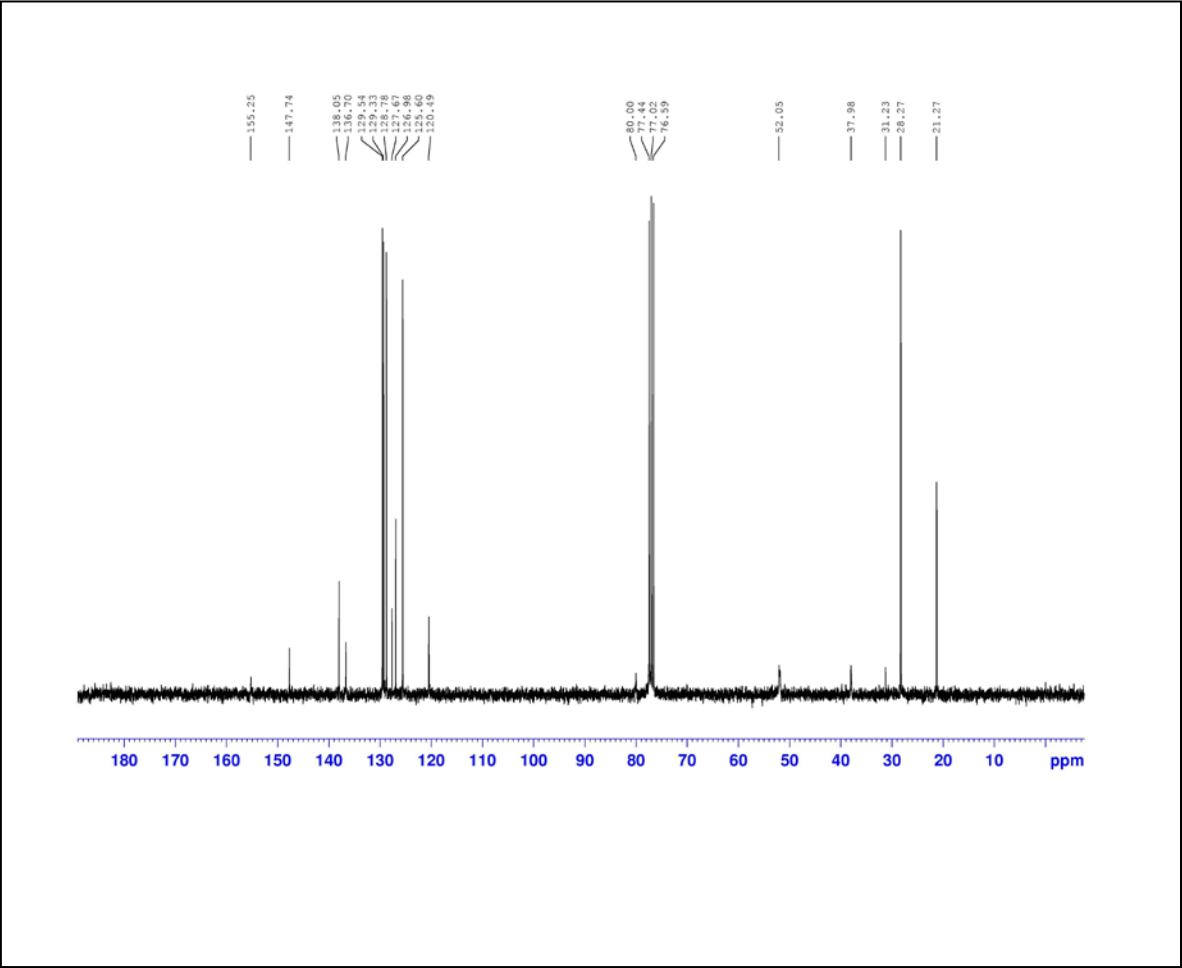



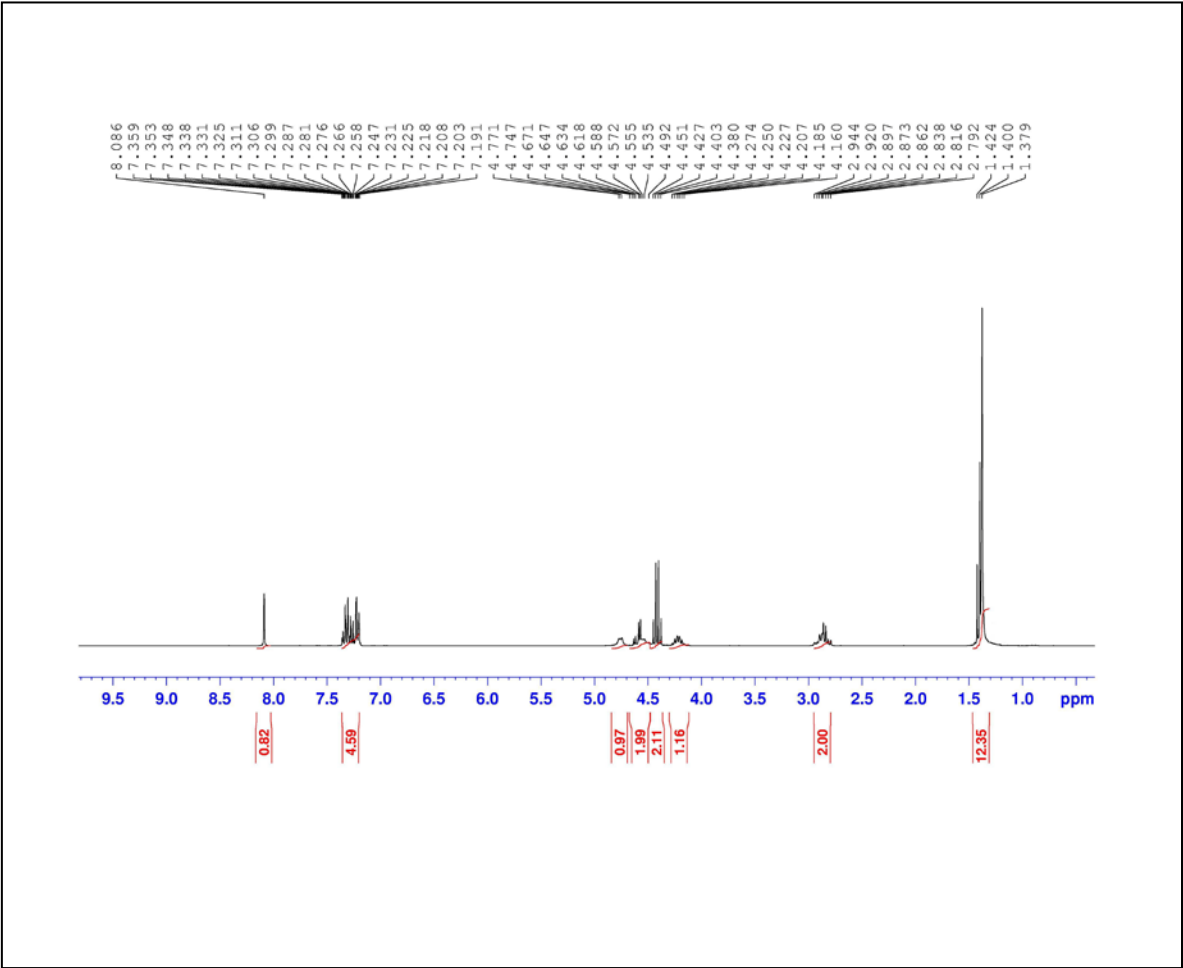

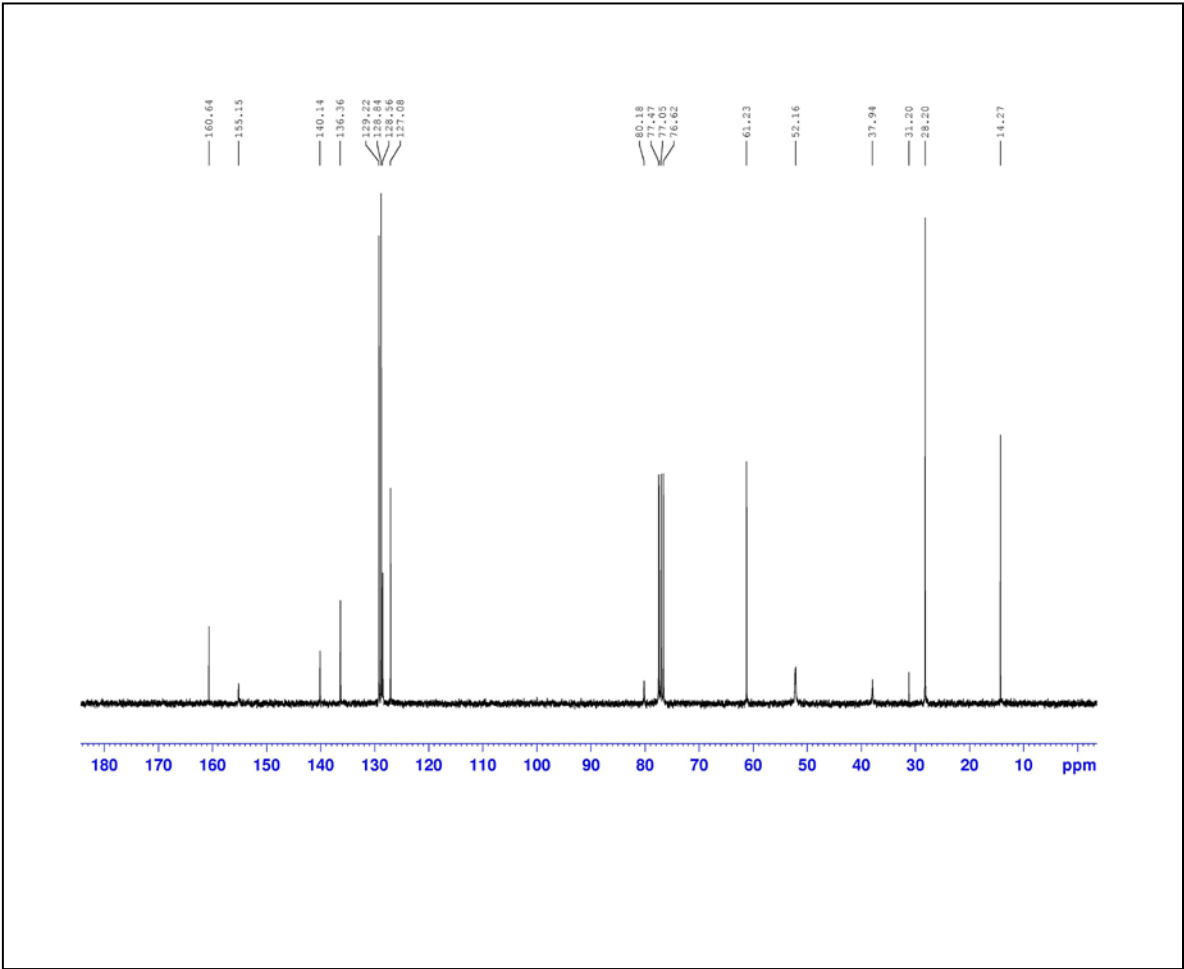

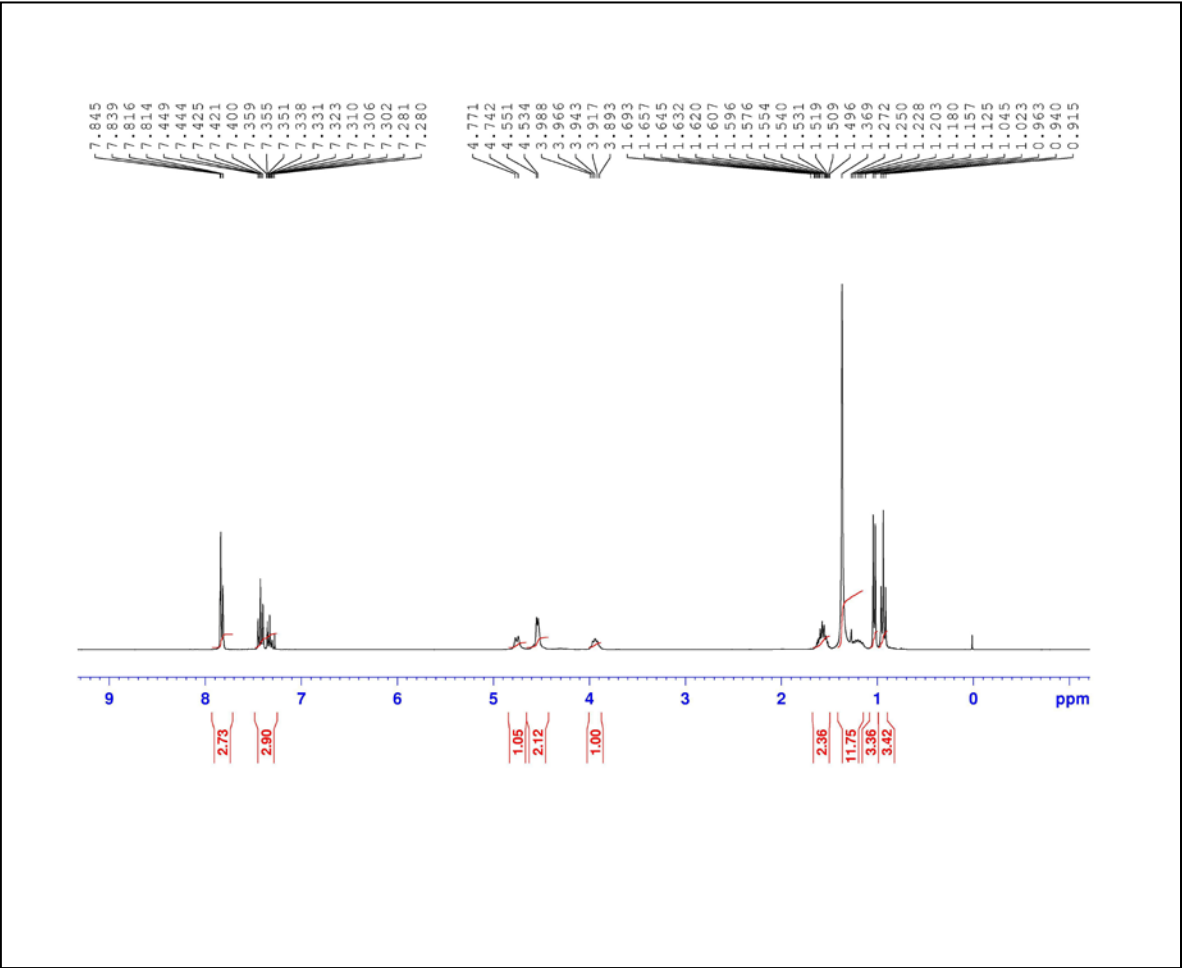

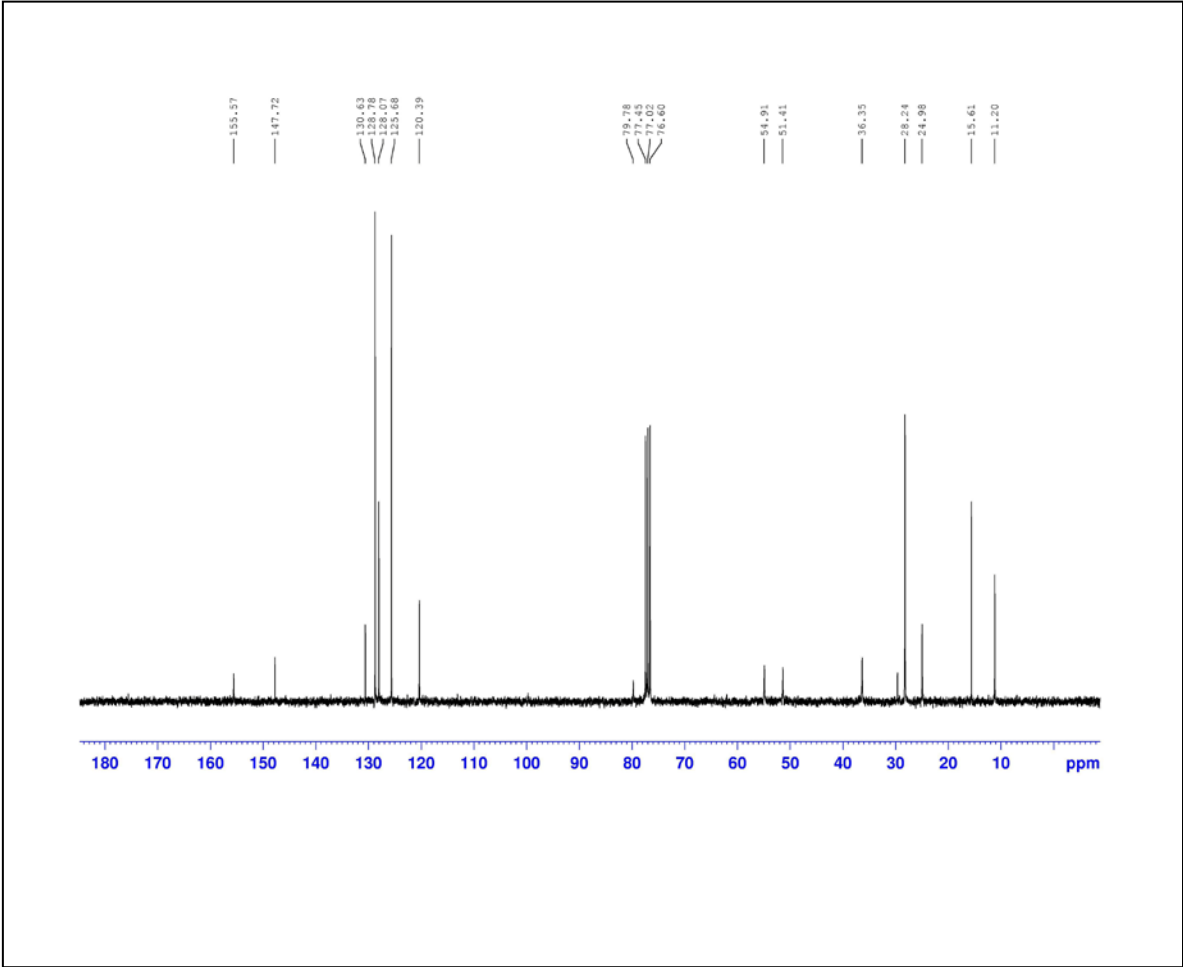

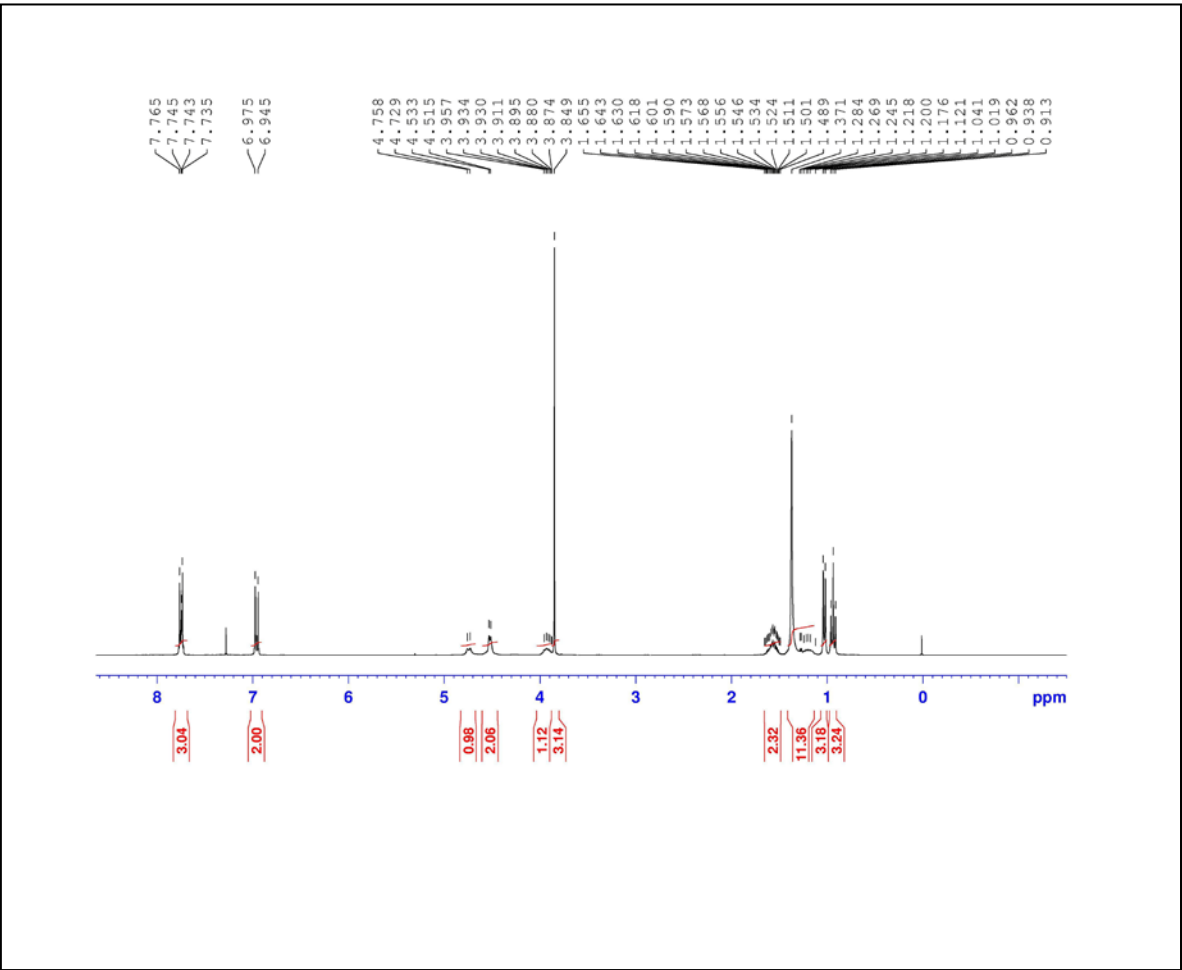

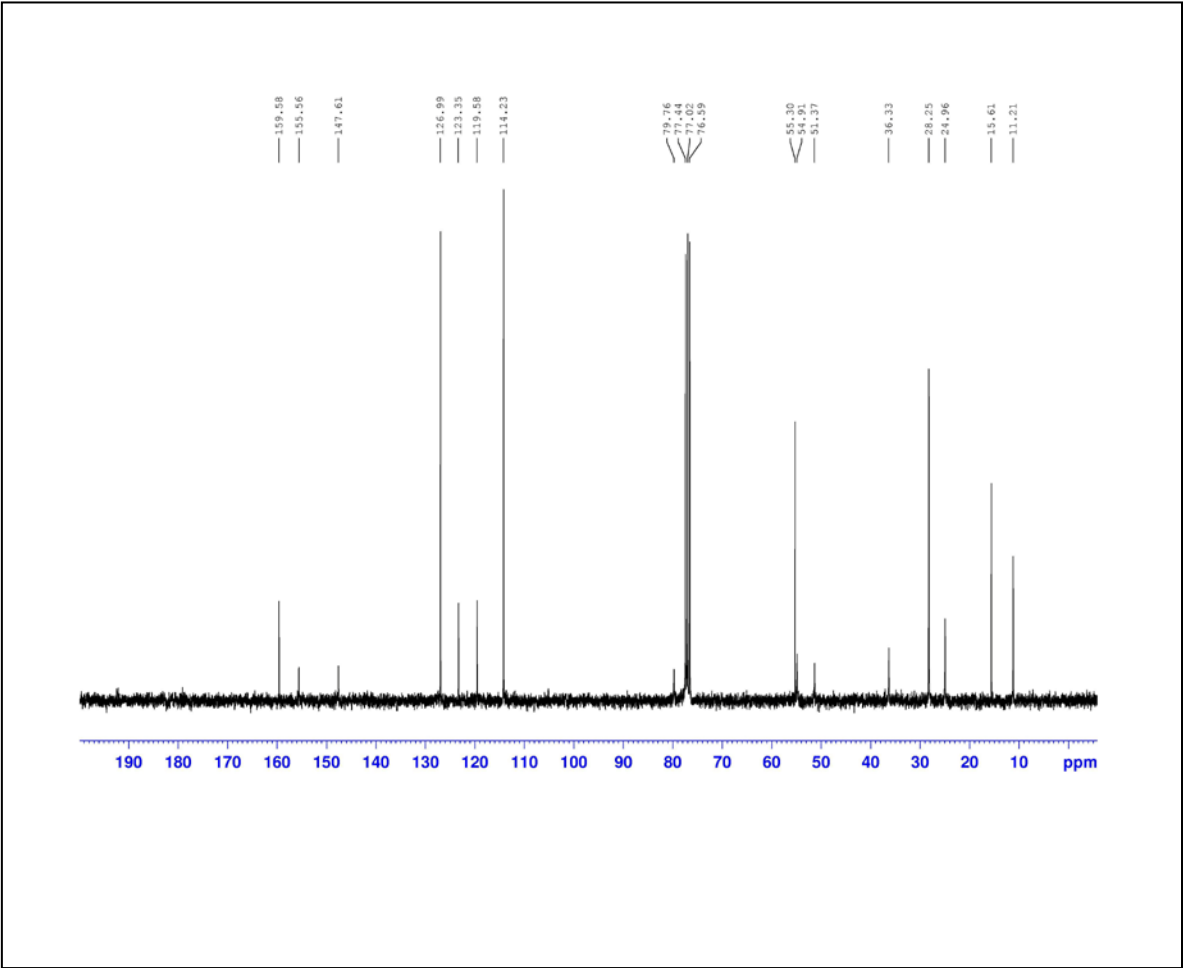

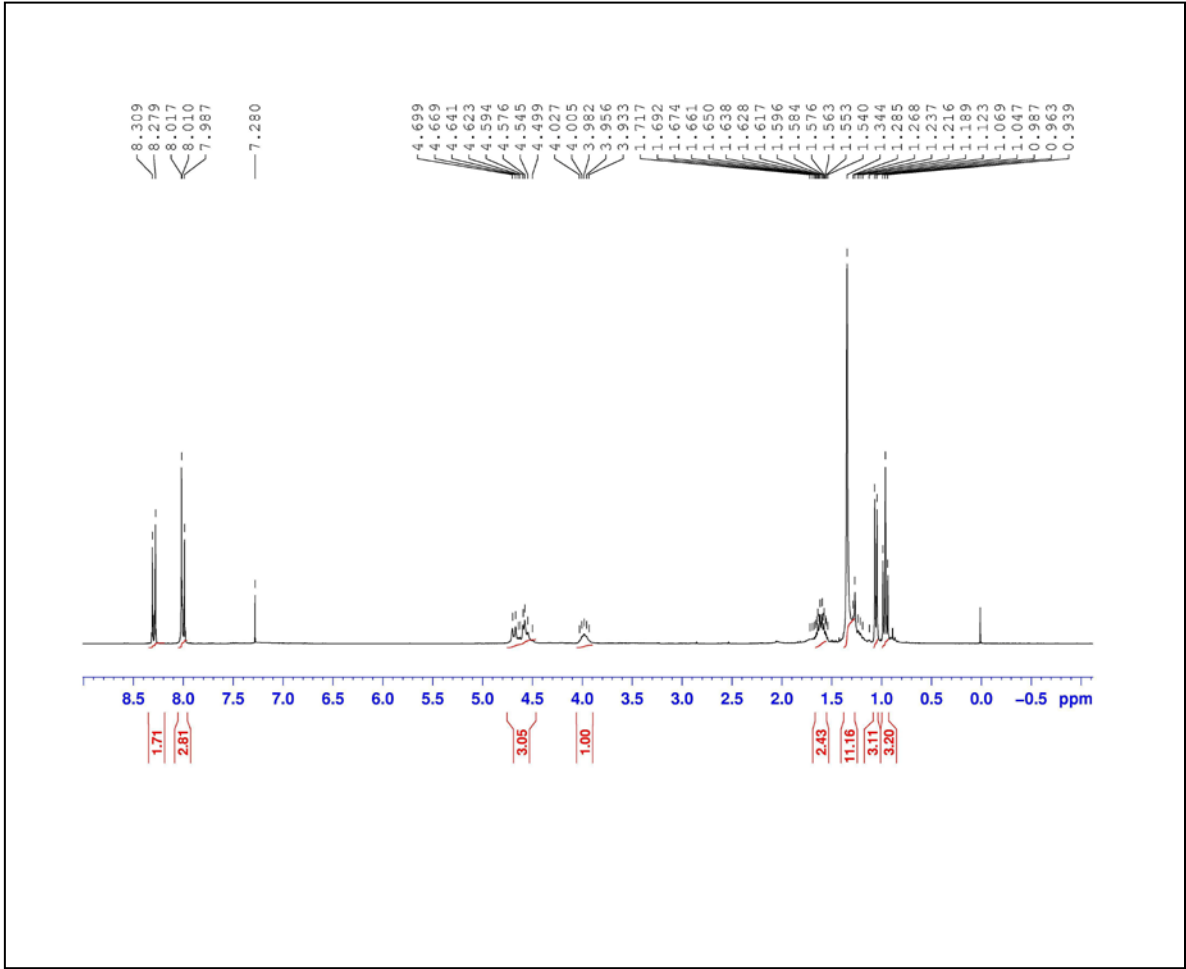

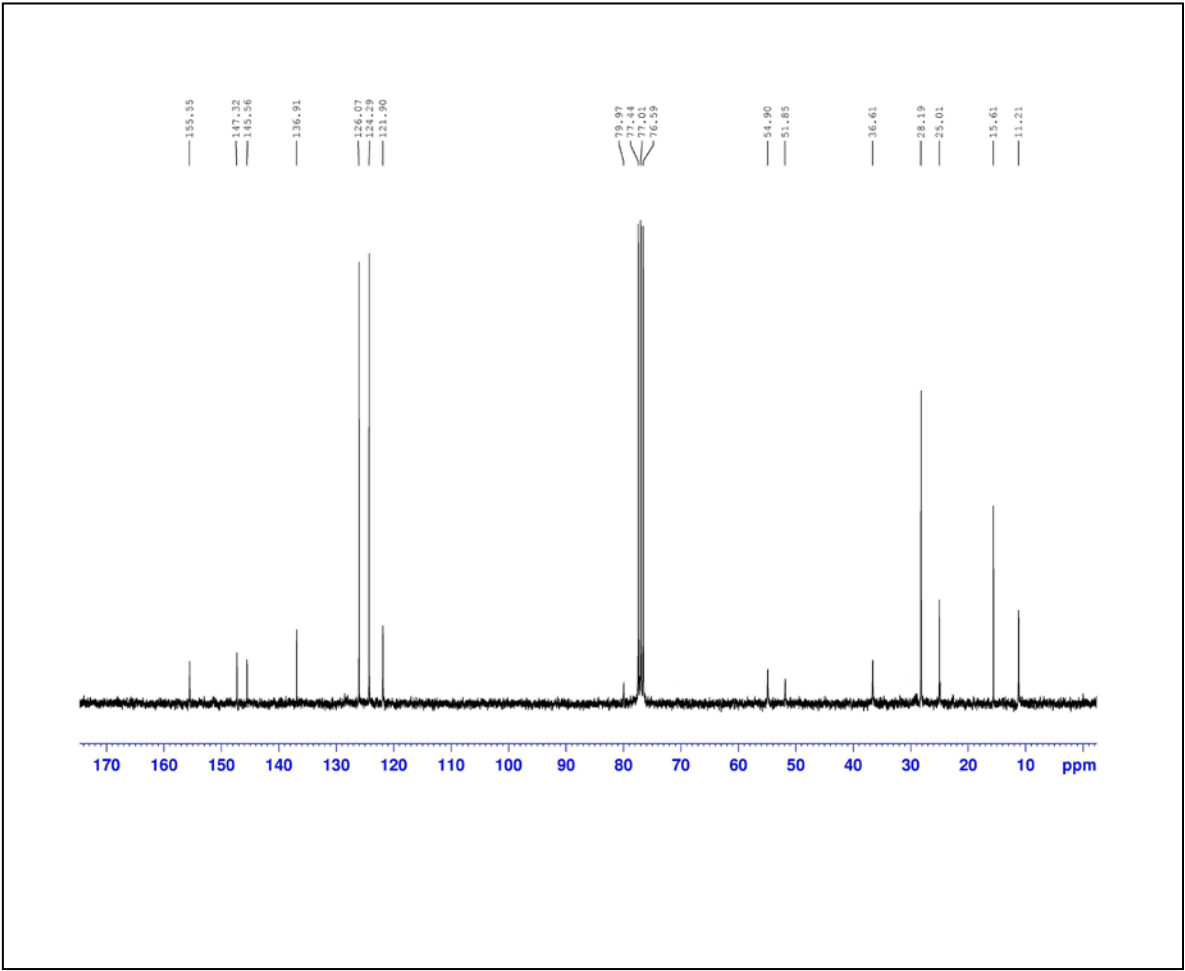



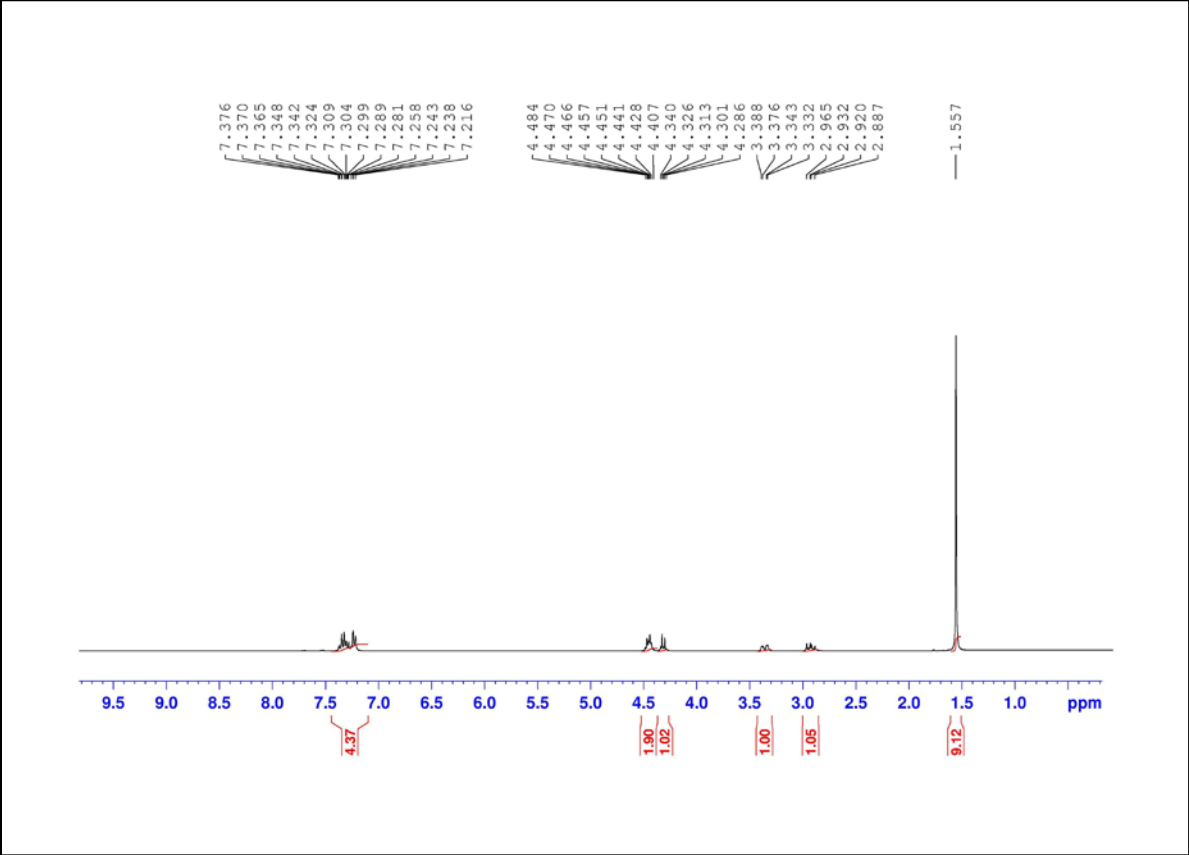

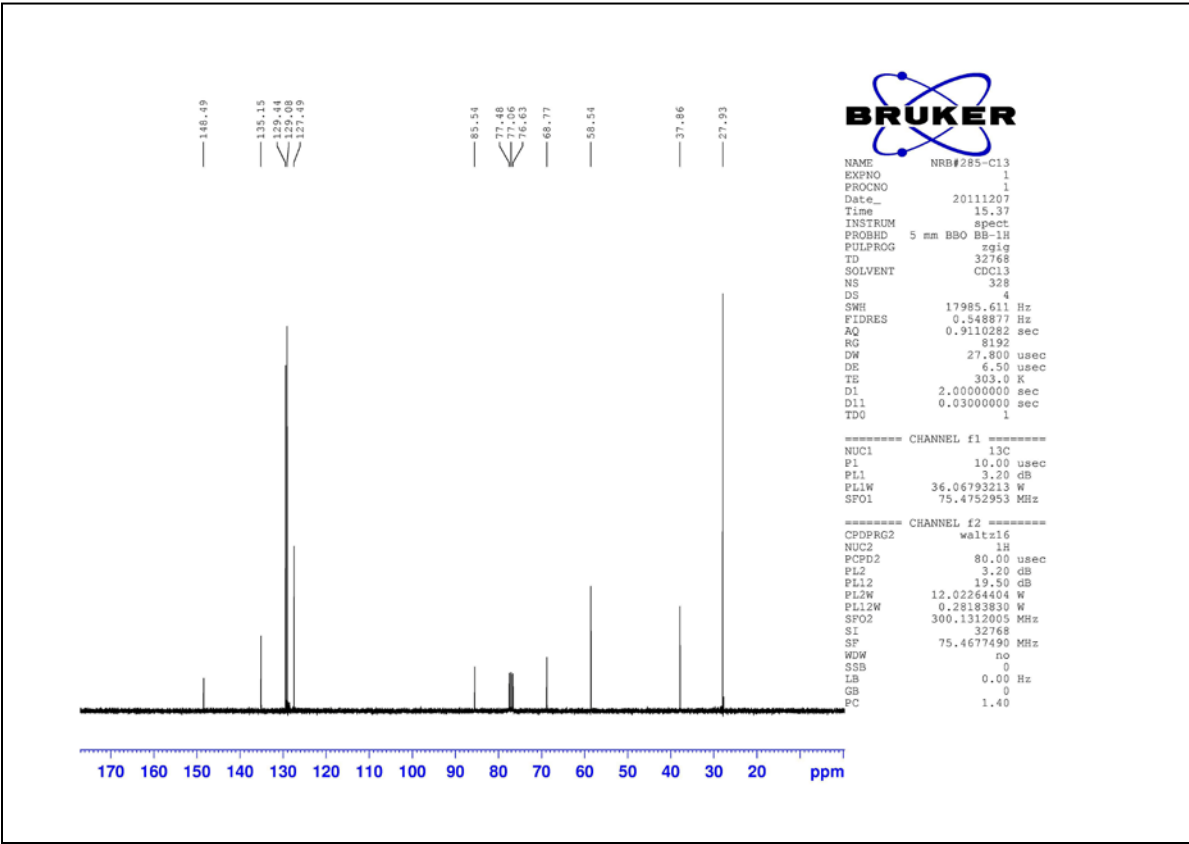

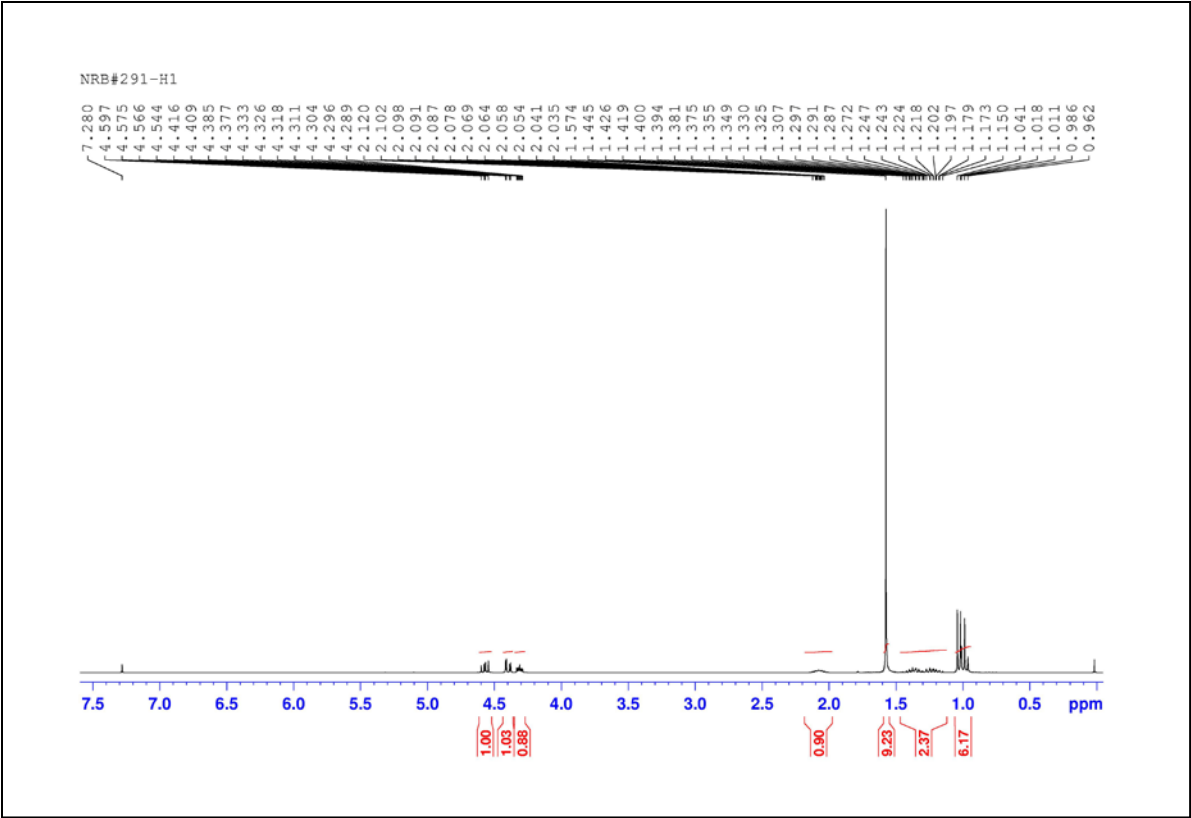

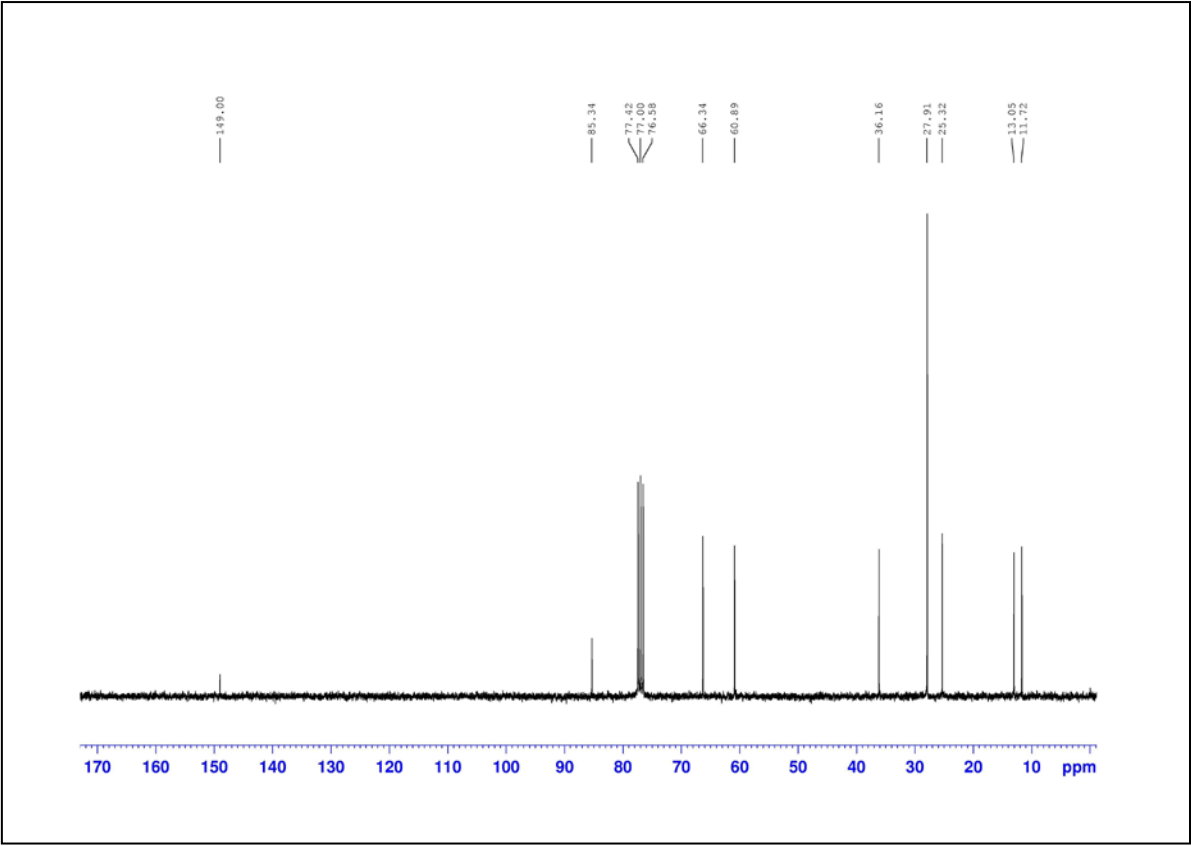

Supplement: c2cc32392c.pdf [file c2cc32392c.pdf]
